# Supplementary material for: The Morita–Baylis–Hillman adducts of β-aryl nitroethylenes with other activated alkenes: synthesis and anticancer activity studies
Source: Royal Society of Chemistry journal article supplement (doi:10.1039/b512267h), 2005-11-21
Supplement: b512267h-(c).pdf [file b512267h-%28c%29.pdf]

Copies of NMR Spectra  
For

**The Morita-Baylis-Hillman adducts of *p*-aryl nitroethylenes with other activated alkenes: synthesis and anticancer activity studies**

**Mamta Dadwal,<sup>a</sup> Renu Mohan,<sup>b</sup> Dulal Panda,<sup>b\*</sup> Shaik M. Mobin,<sup>c</sup> Irishi N. N. Namboothiri<sup>a\*</sup>**

**Table of Contents**

|                                                           | Page |
|-----------------------------------------------------------|------|
| 1 Figure S1. <sup>1</sup> H NMR Spectrum of <b>3a</b>     | 2    |
| 2 Figure S2. <sup>13</sup> C NMR Spectrum of <b>3a</b>    | 3    |
| 3 Figure S3. <sup>1</sup> H NMR Spectrum of <b>3b</b>     | 4    |
| 4 Figure S4. <sup>13</sup> C NMR Spectrum of <b>3b</b>    | 5    |
| 5 Figure S5. <sup>1</sup> H NMR Spectrum of <b>3c</b>     | 6    |
| 6 Figure S6. <sup>13</sup> C NMR Spectrum of <b>3c</b>    | 7    |
| 7 Figure S7. <sup>1</sup> H NMR Spectrum of <b>3d</b>     | 8    |
| 8 Figure S8. <sup>13</sup> C NMR Spectrum of <b>3d</b>    | 9    |
| 9 Figure S9. <sup>1</sup> H NMR Spectrum of <b>3e</b>     | 10   |
| 10 Figure S10. <sup>13</sup> C NMR Spectrum of <b>3e</b>  | 11   |
| 11 Figure S11. <sup>1</sup> H NMR Spectrum of <b>3f</b>   | 12   |
| 12 Figure S12. <sup>13</sup> C NMR Spectrum of <b>3f</b>  | 13   |
| 13 Figure S13. <sup>1</sup> H NMR Spectrum of <b>3g</b>   | 14   |
| 14 Figure S14. <sup>13</sup> C NMR Spectrum of <b>3g</b>  | 15   |
| 15 Figure S15. <sup>1</sup> H NOESY Spectrum of <b>3g</b> | 16   |
| 16 Figure S16. <sup>1</sup> H NMR Spectrum of <b>3h</b>   | 17   |
| 17 Figure S17. <sup>13</sup> C NMR Spectrum of <b>3h</b>  | 18   |
| 18 Figure S18. <sup>1</sup> H NMR Spectrum of <b>3i</b>   | 19   |
| 19 Figure S19. <sup>13</sup> C NMR Spectrum of <b>3i</b>  | 20   |
| 20 Figure S20. <sup>1</sup> H NMR Spectrum of <b>3j</b>   | 21   |
| 21 Figure S21. <sup>13</sup> C NMR Spectrum of <b>3j</b>  | 22   |
| 22 Figure S22. <sup>1</sup> H NMR Spectrum of <b>5a</b>   | 23   |
| 23 Figure S23. <sup>13</sup> C NMR Spectrum of <b>5a</b>  | 24   |
| 24 Figure S24. <sup>1</sup> H NMR Spectrum of <b>5g</b>   | 25   |
| 25 Figure S25. <sup>13</sup> C NMR Spectrum of <b>5g</b>  | 26   |
| 26 Figure S26. <sup>1</sup> H NMR Spectrum of <b>5h</b>   | 27   |
| 27 Figure S27. <sup>13</sup> C NMR Spectrum of <b>5h</b>  | 28   |
| 28 Figure S28. <sup>1</sup> H NMR Spectrum of <b>5i</b>   | 29   |
| 29 Figure S29. <sup>13</sup> C NMR Spectrum of <b>5i</b>  | 30   |

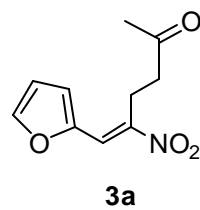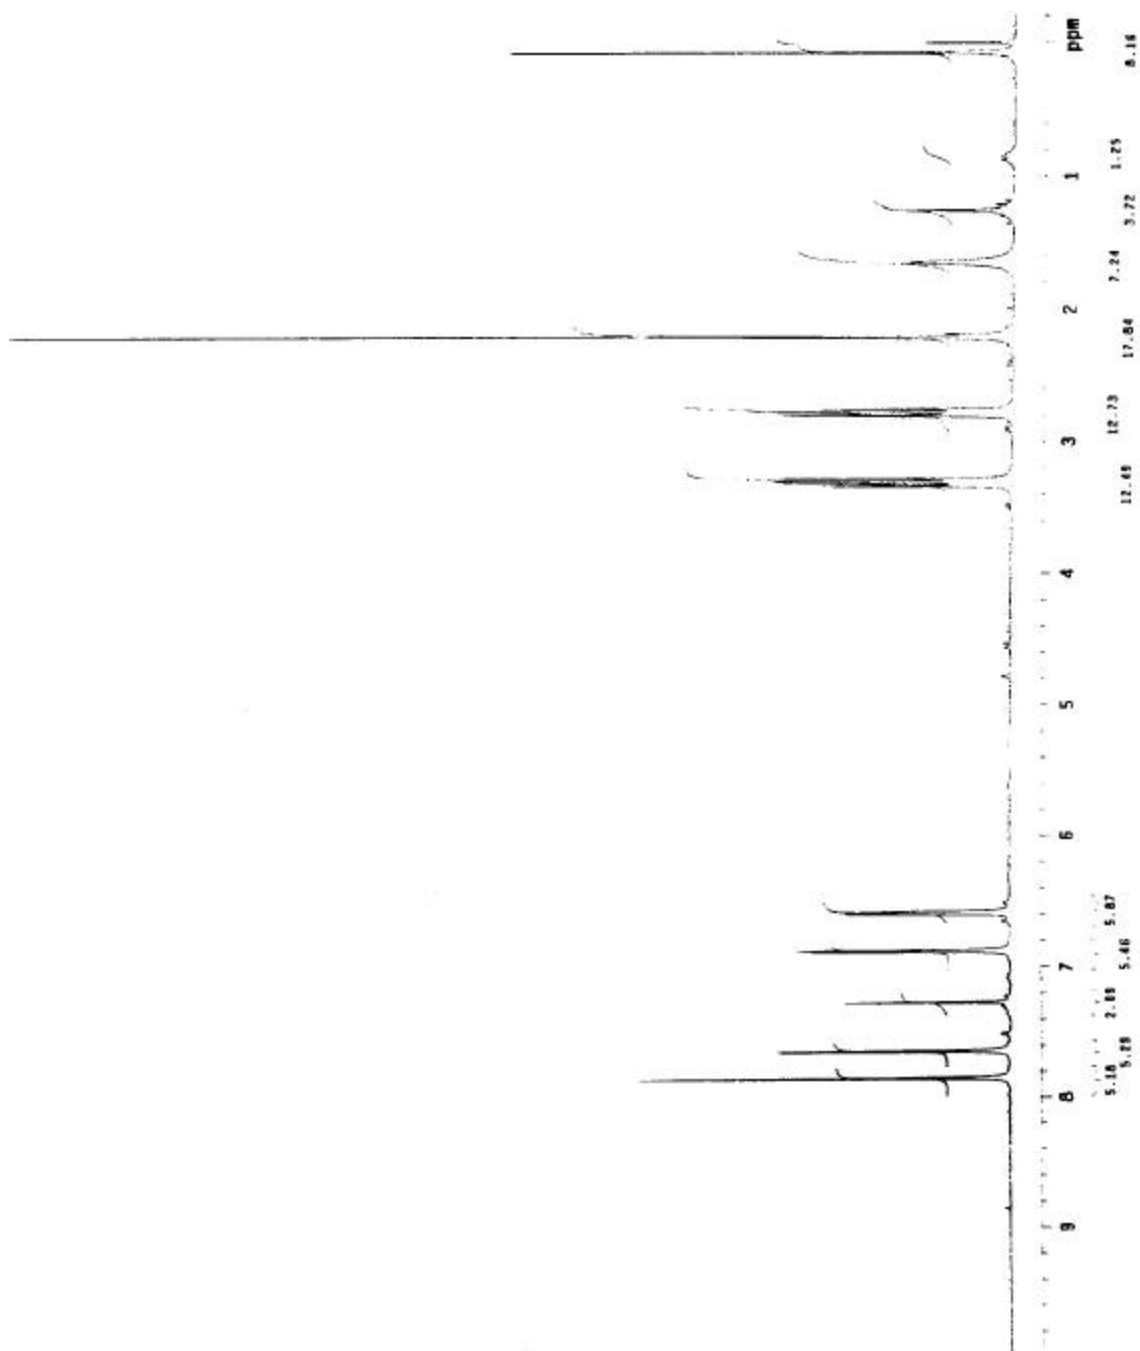

**Figure S1.** <sup>1</sup>H NMR Spectrum of **3a**

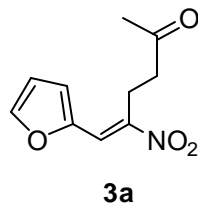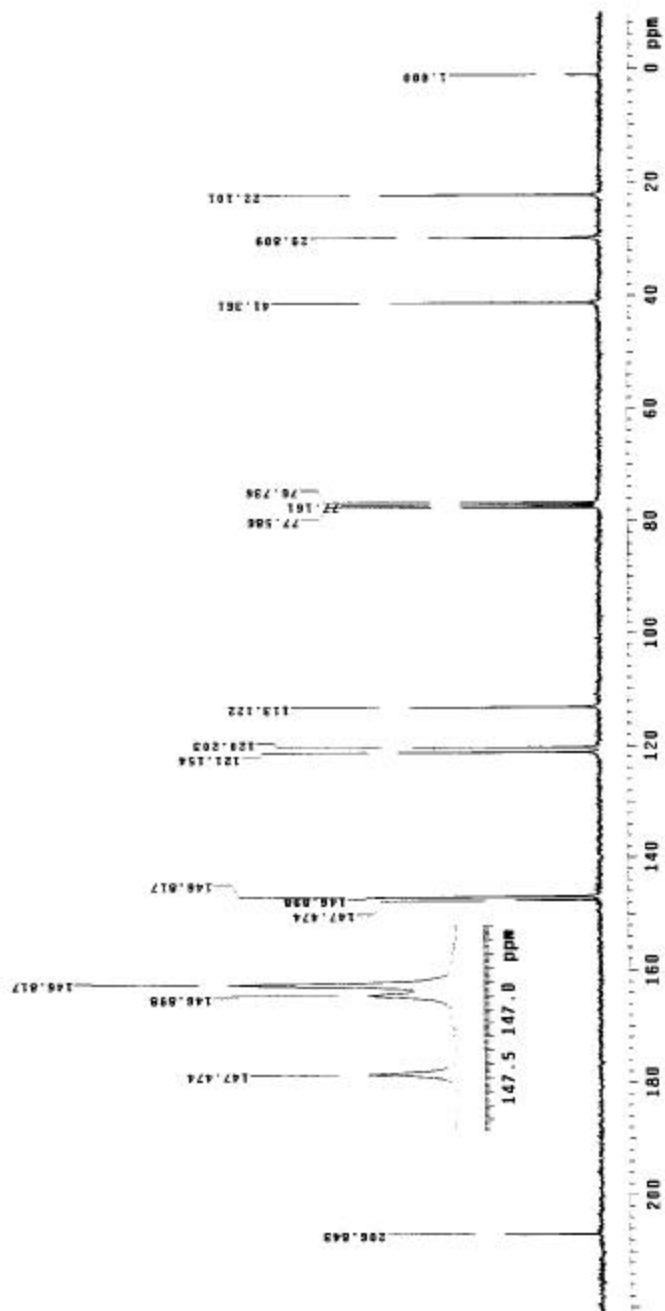

**Figure S2.**  $^{13}\text{C}$  NMR Spectrum of **3a**

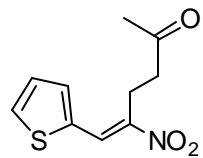

**3b**

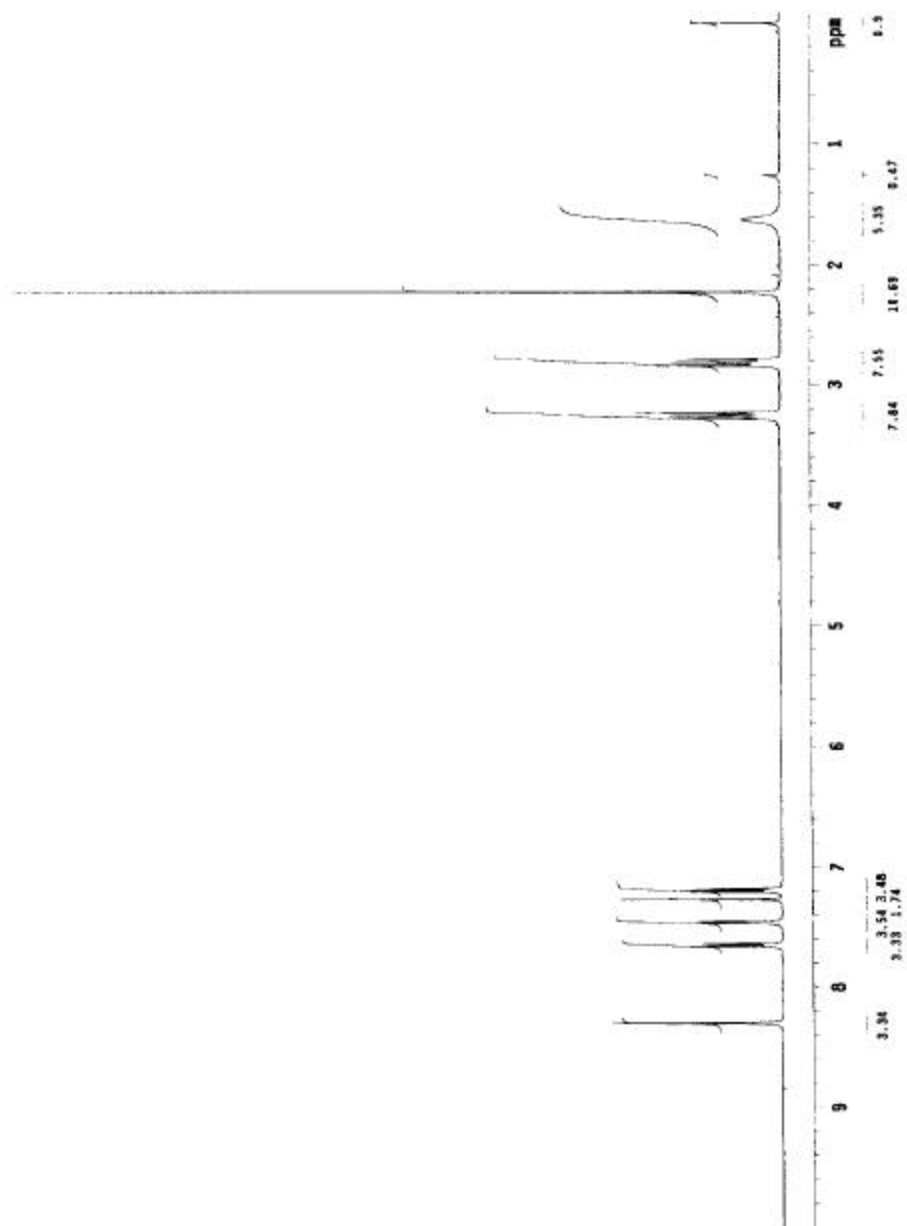

**Figure S3.** <sup>1</sup>H NMR Spectrum of **3b**

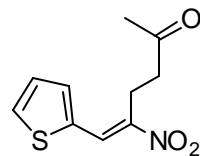

**3b**

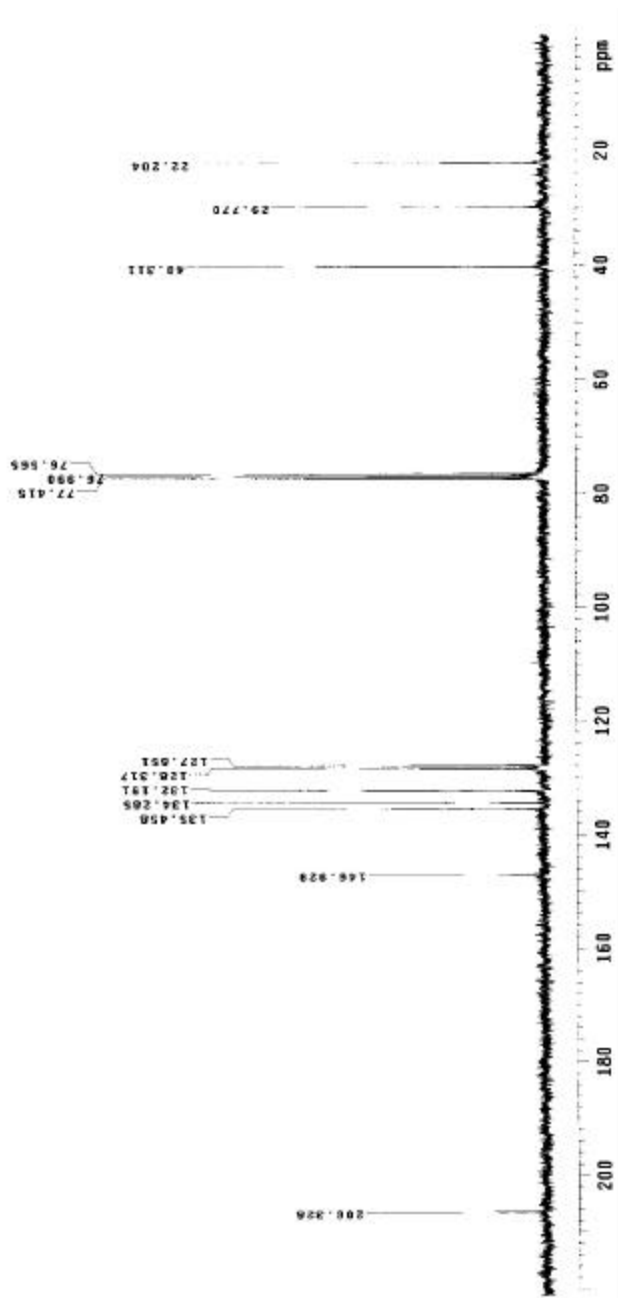

**Figure S4.** <sup>13</sup>C NMR Spectrum of **3b**

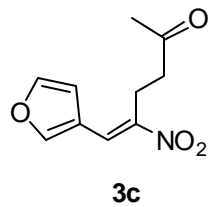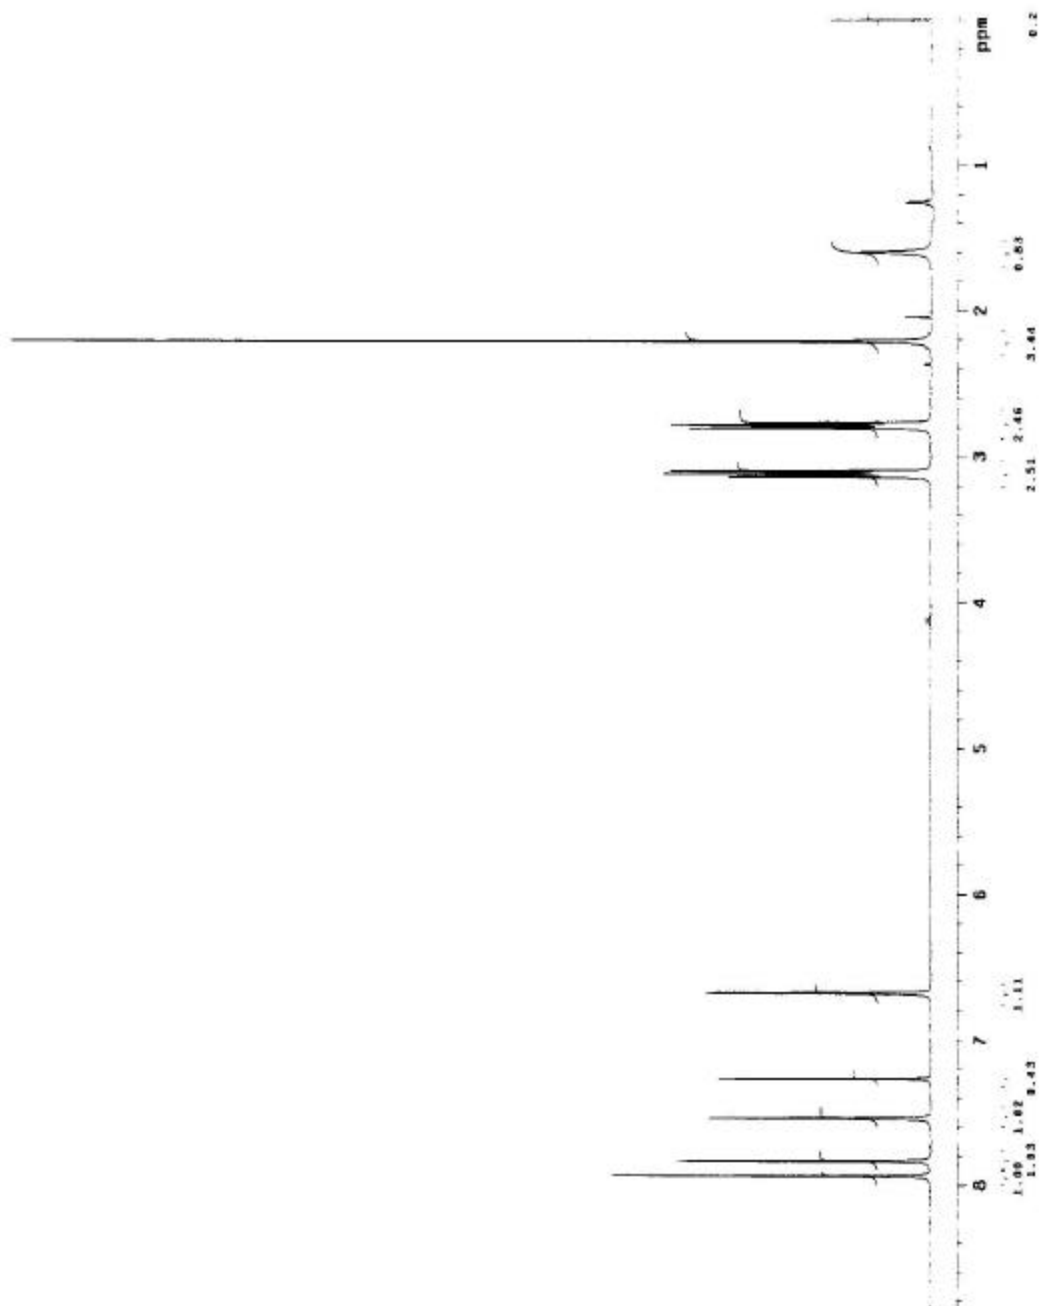

**Figure S5.**  $^1\text{H}$  NMR Spectrum of **3c**

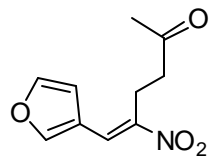

**3c**

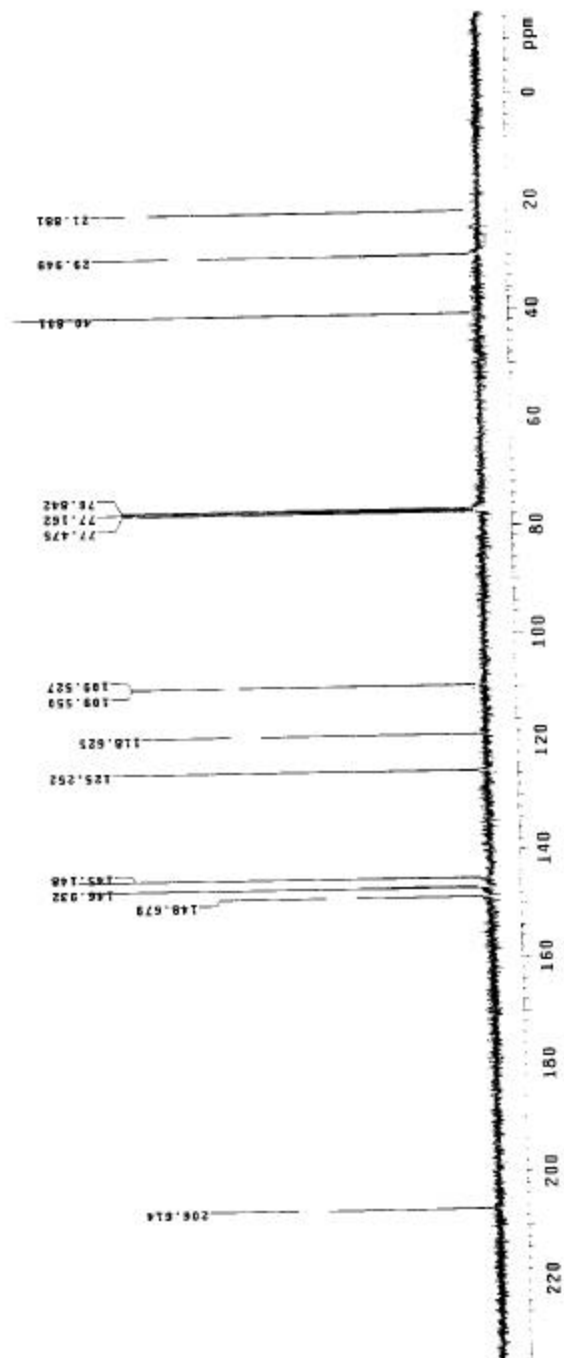

**Figure S6.** <sup>13</sup>C NMR Spectrum of **3c**

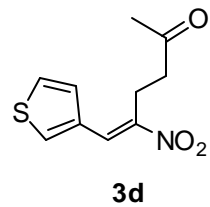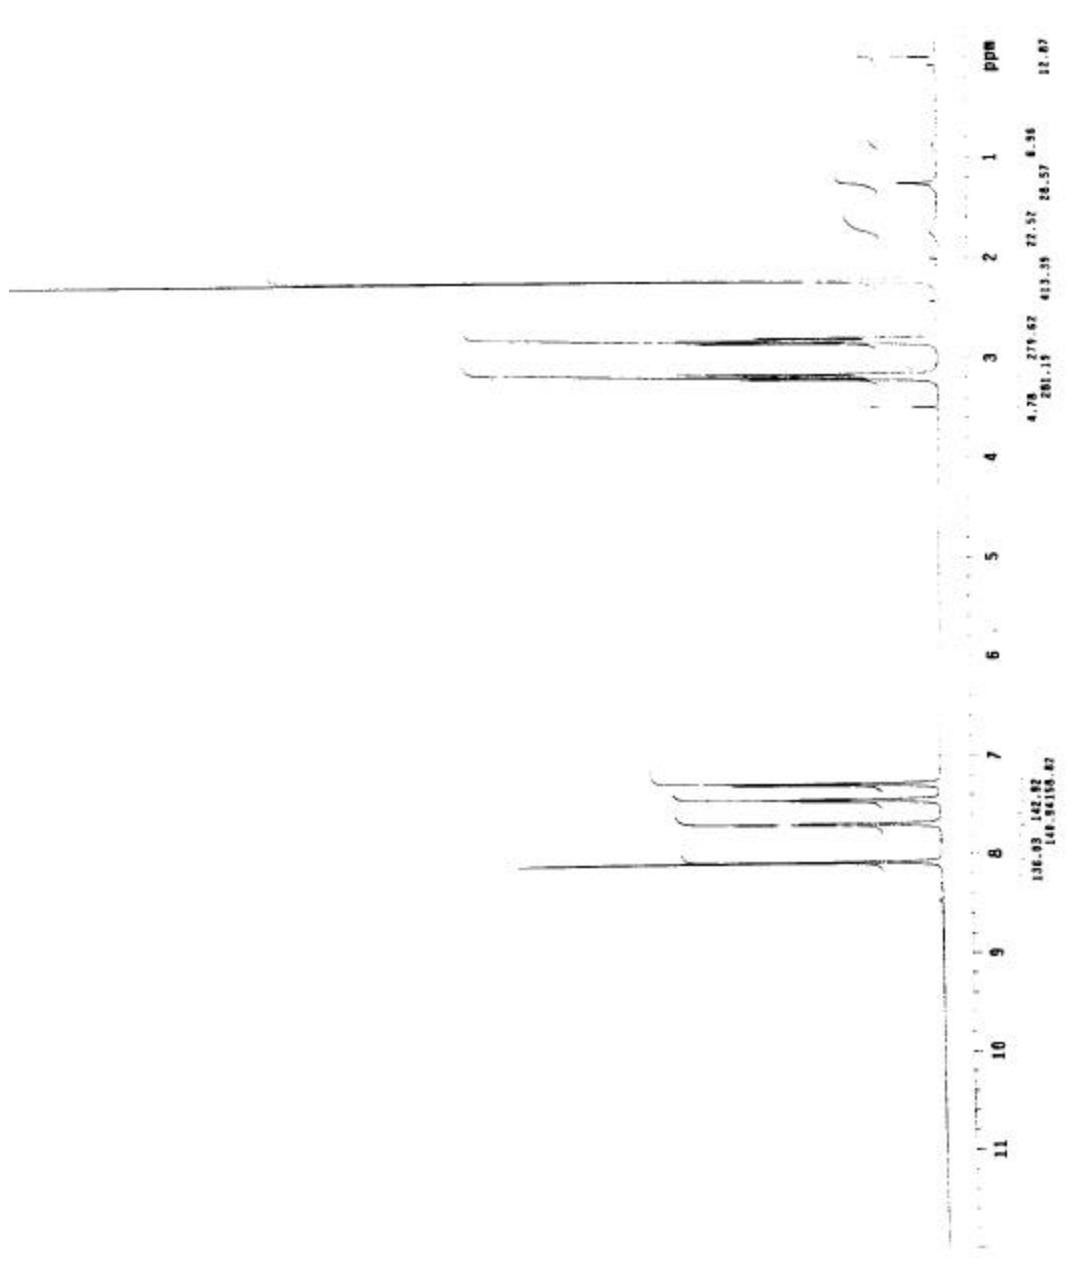

**Figure S7.**  $^1\text{H}$  NMR Spectrum of **3d**



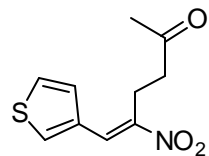

3d

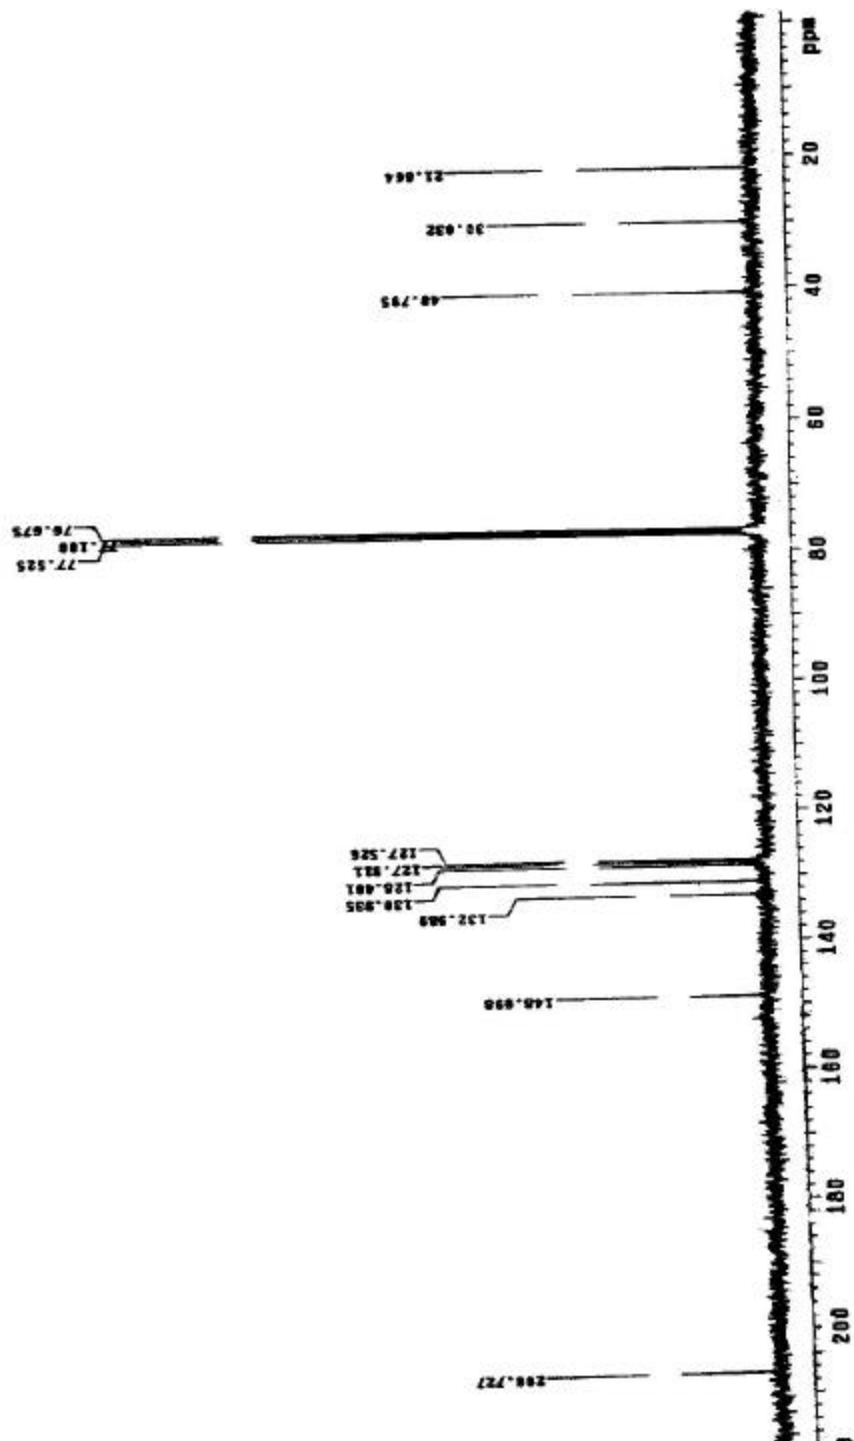

Figure S8. <sup>13</sup>C NMR Spectrum of 3d

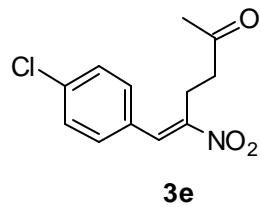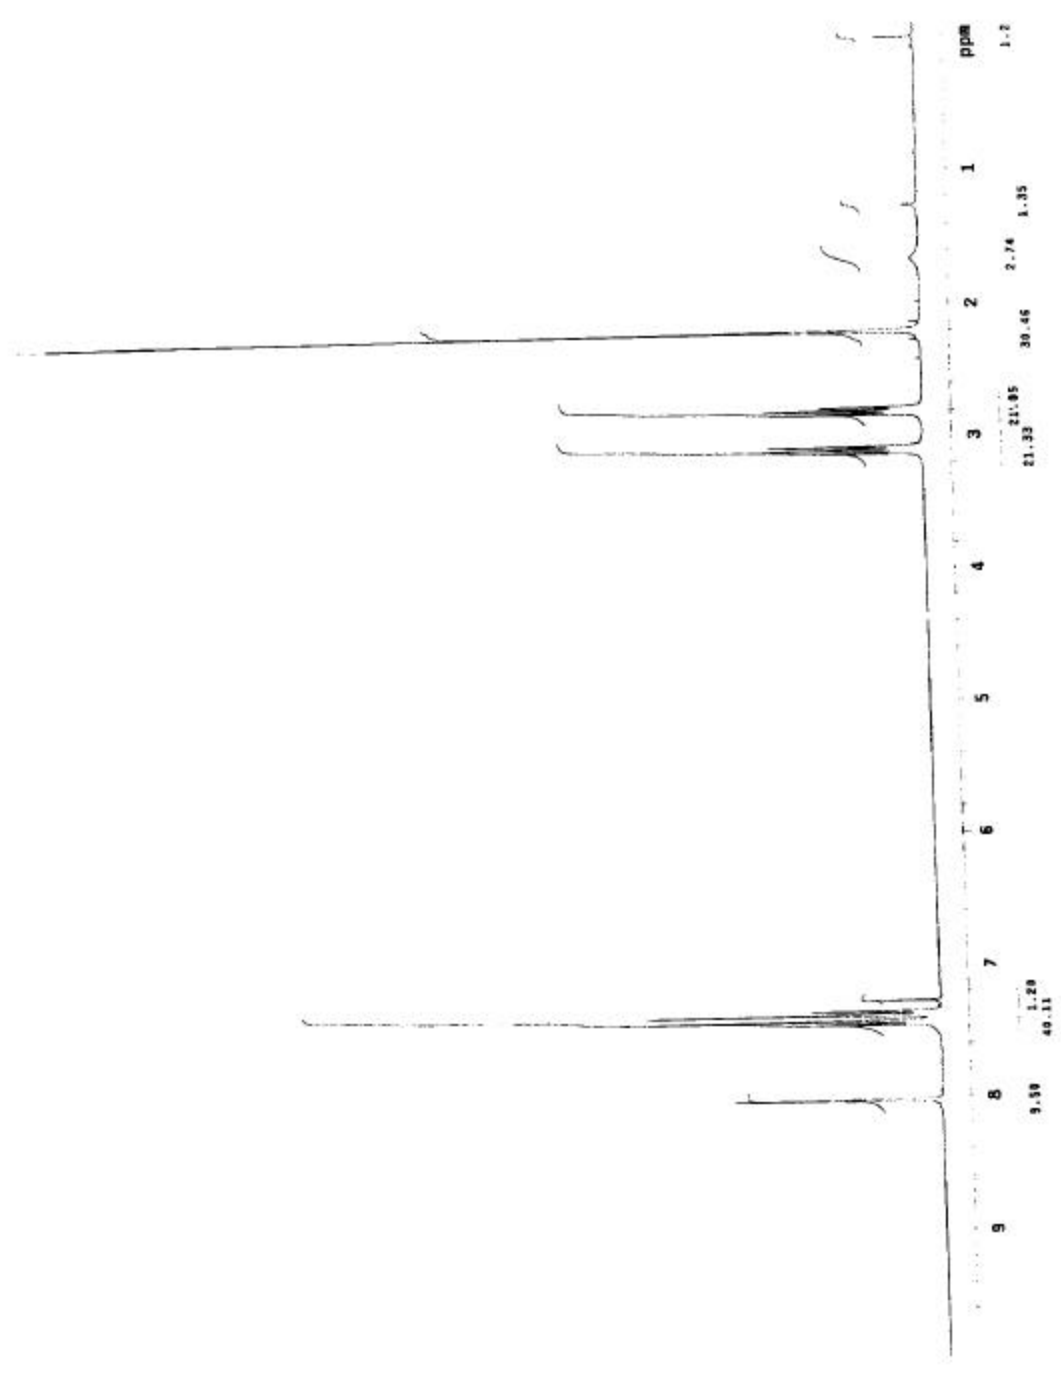

**Figure S9.** <sup>1</sup>H NMR Spectrum of **3e**

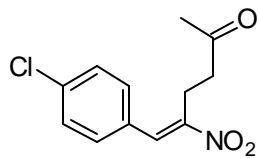

**3e**

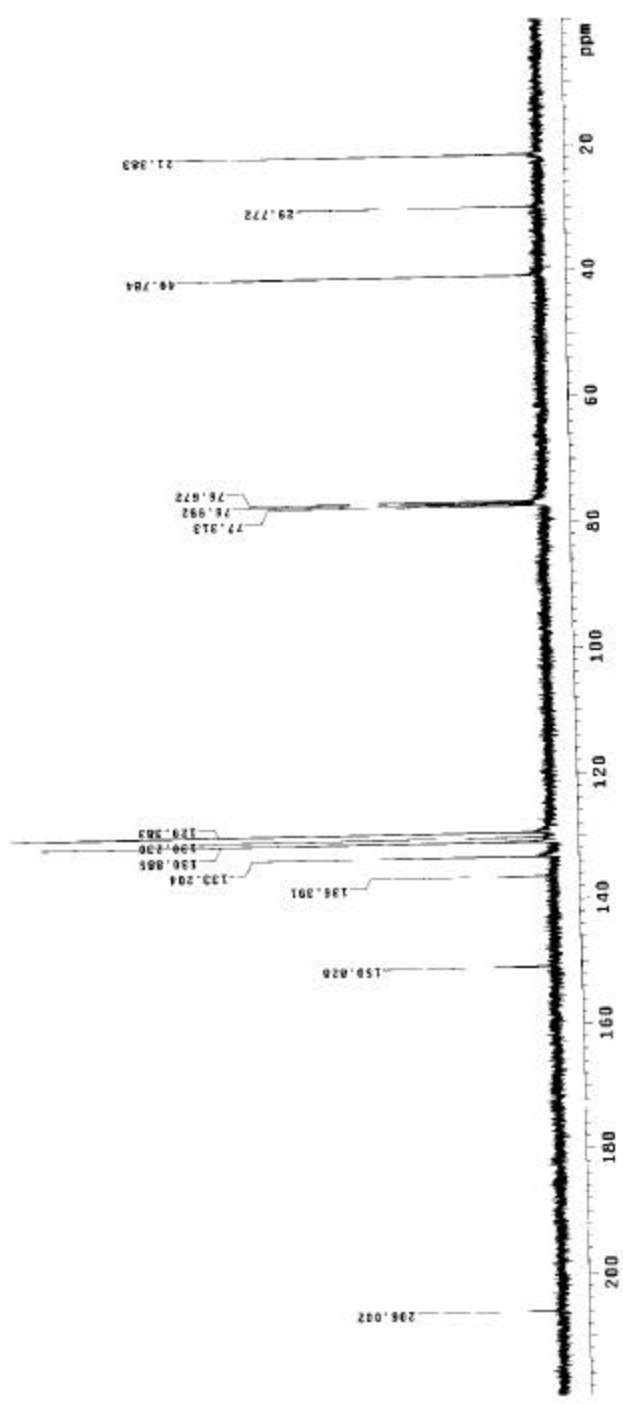

**Figure S10.** <sup>13</sup>C NMR Spectrum of **3e**

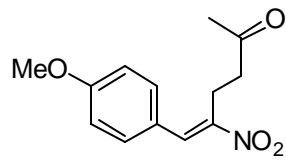

3f

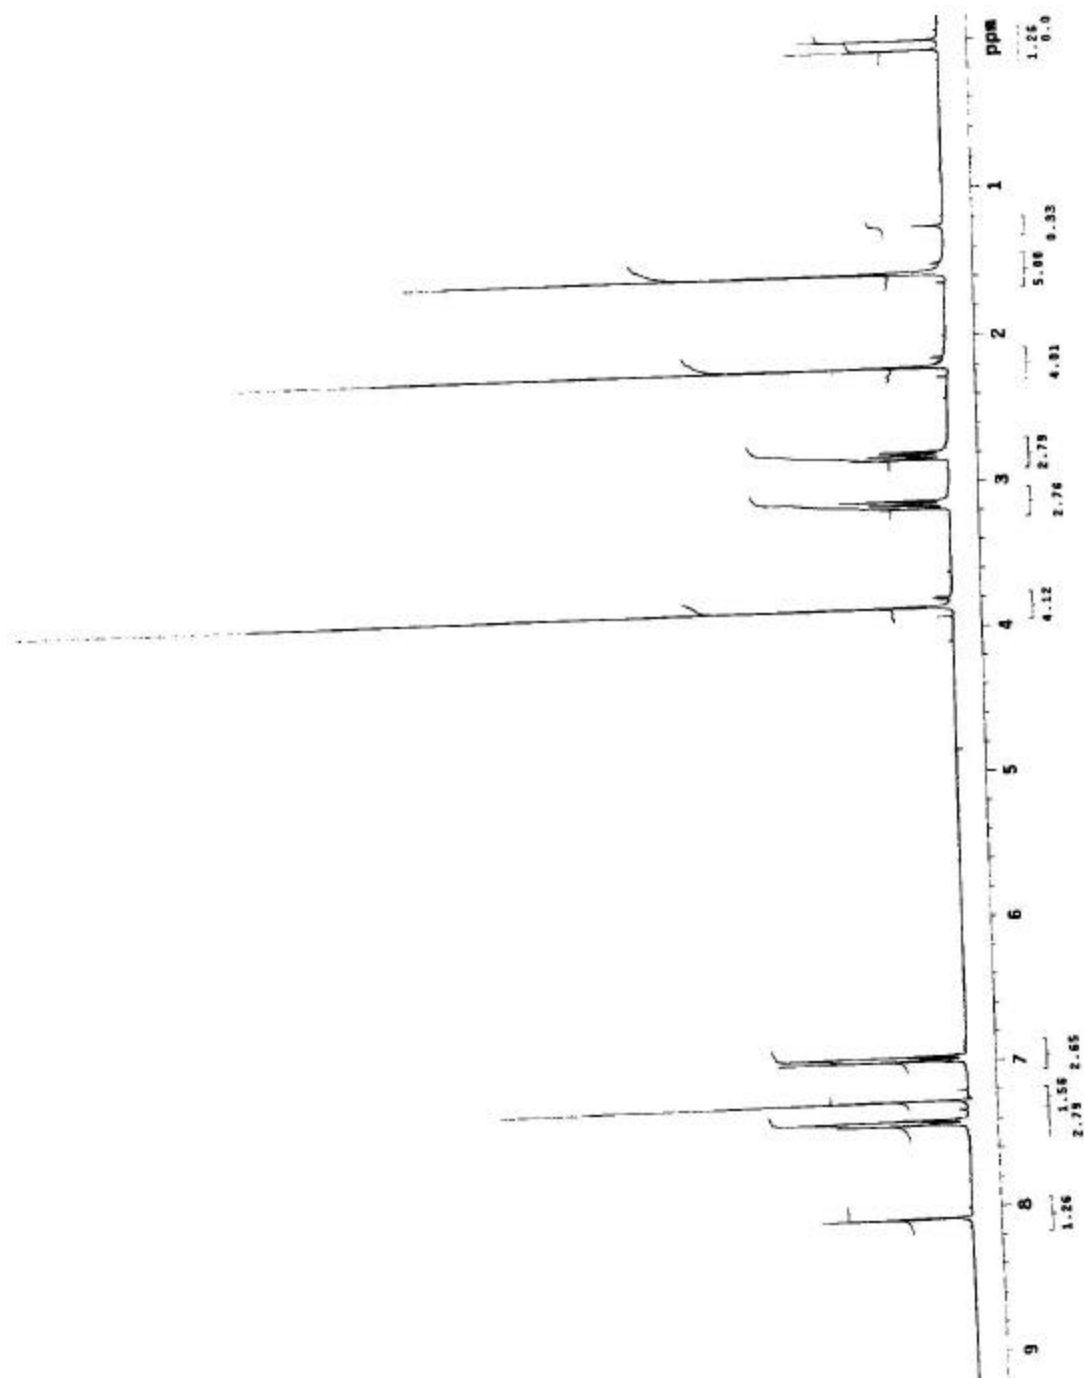

Figure S11. <sup>1</sup>H NMR Spectrum of 3f

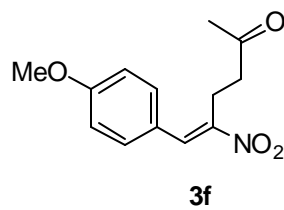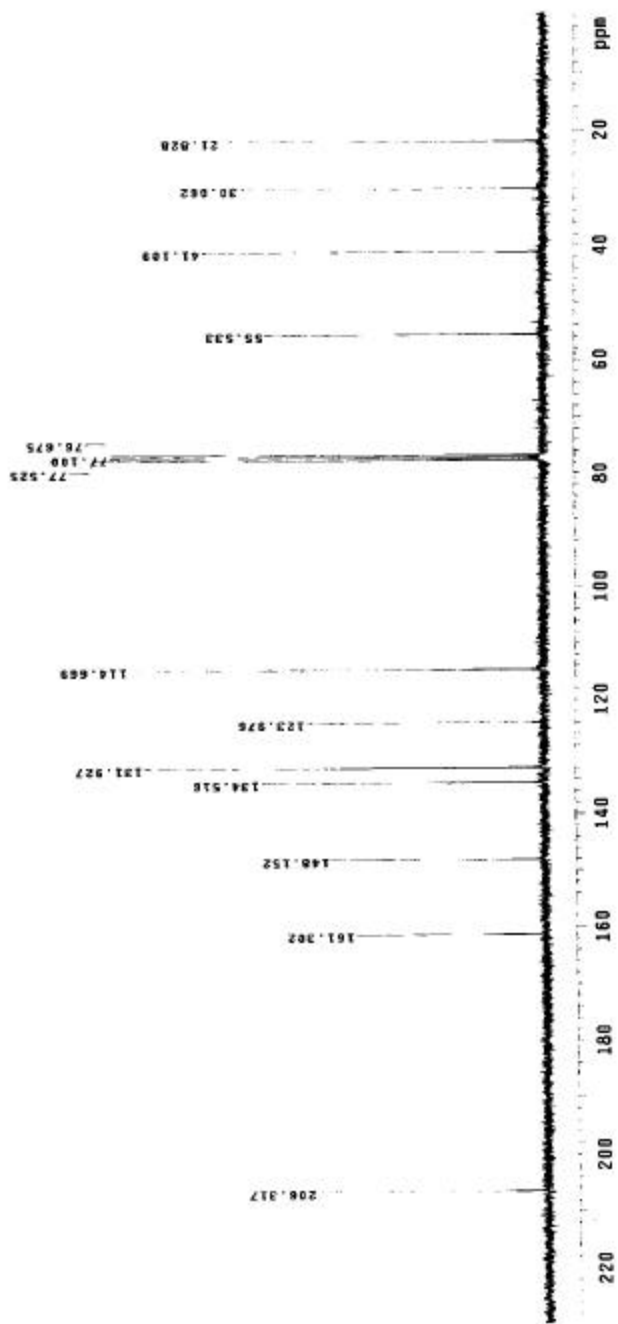

**Figure S12.** <sup>13</sup>C NMR Spectrum of **3f**

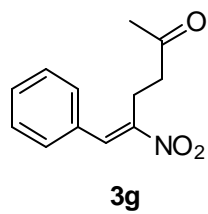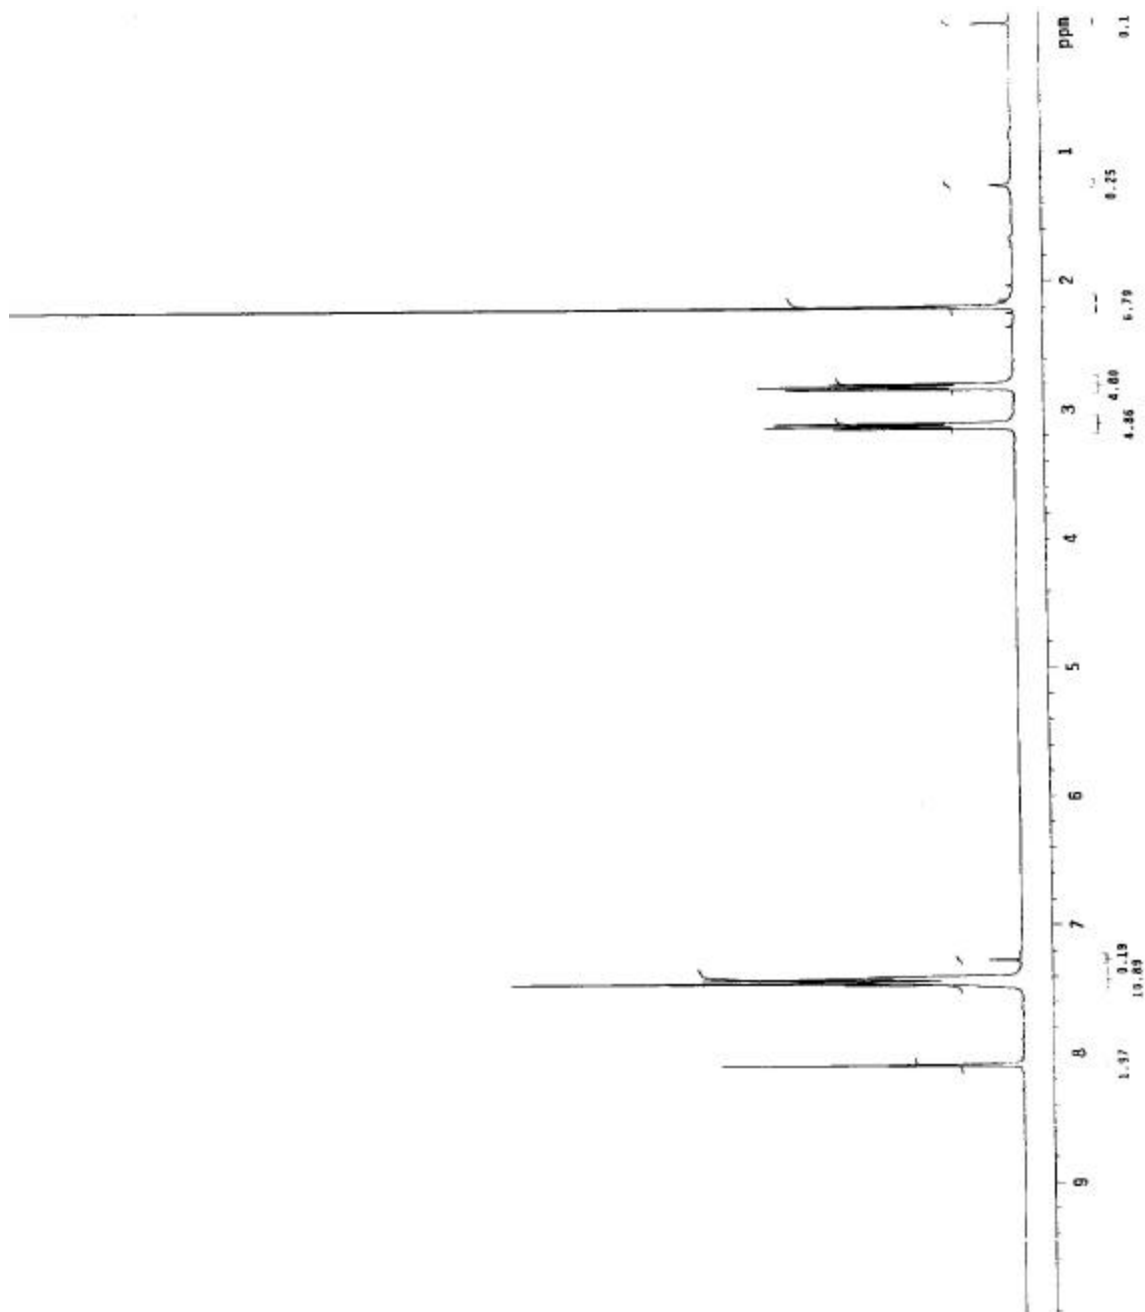

**Figure S13.**  $^1\text{H}$  NMR Spectrum of **3g**

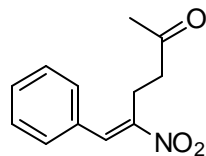

**3g**

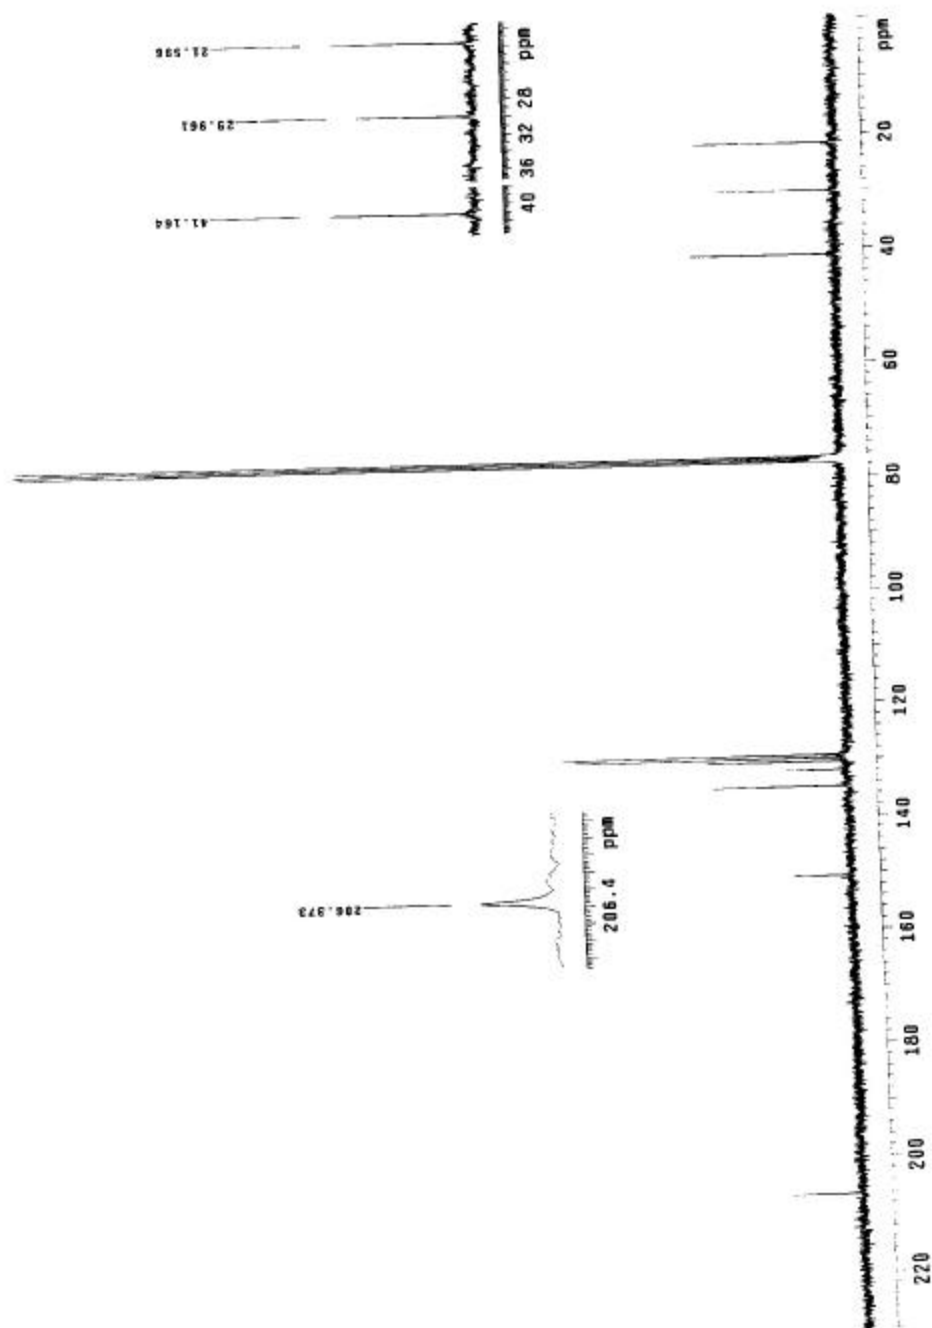

**Figure S14.**  $^{13}\text{C}$  NMR Spectrum of **3g**

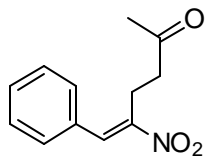

3g

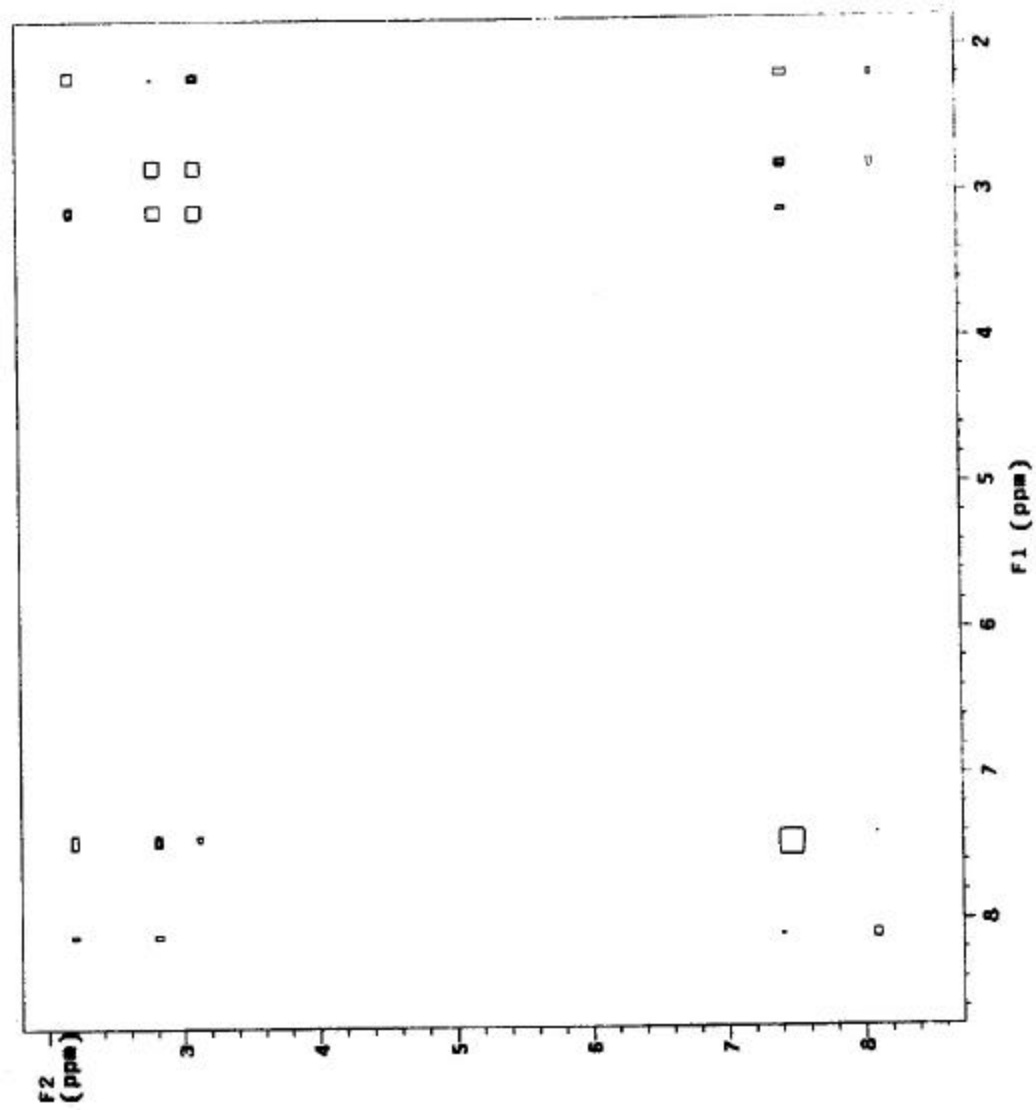

Figure S15. <sup>1</sup>H NOESY Spectrum of 3g



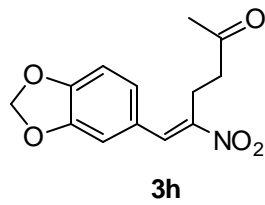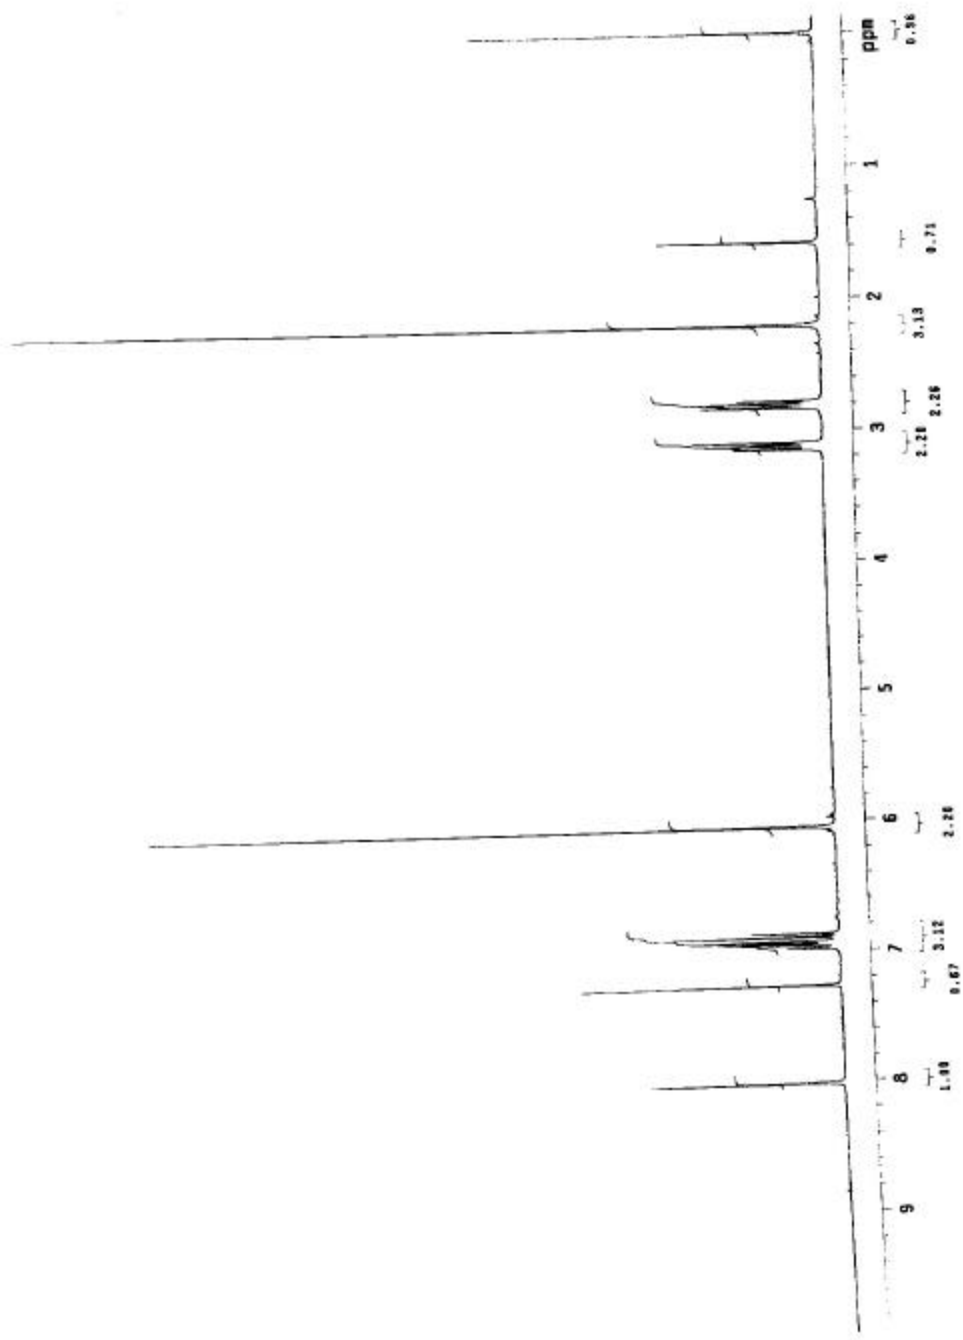

**Figure S16.**  $^1\text{H}$  NMR Spectrum of **3h**

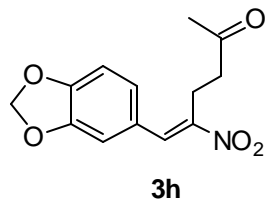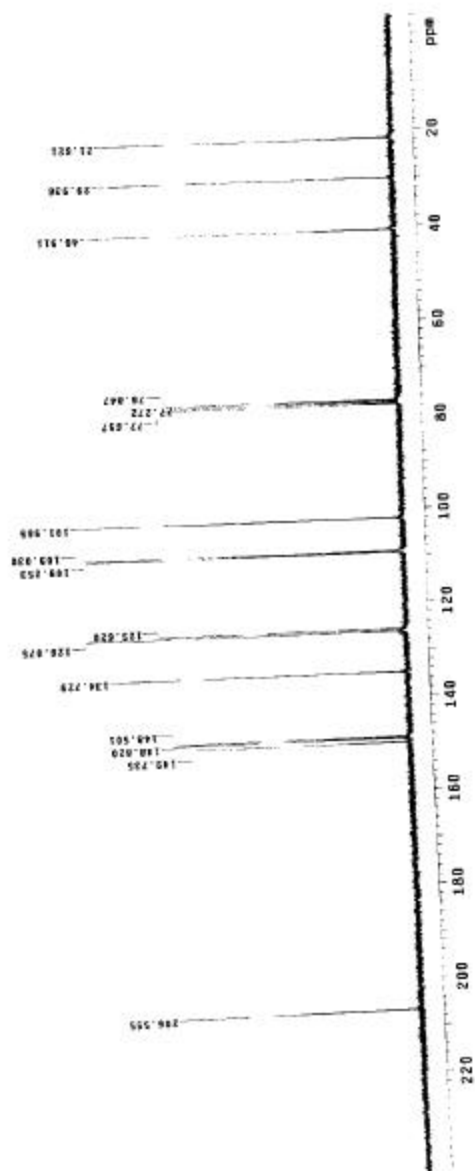

**Figure S17.** <sup>13</sup>C NMR Spectrum of **3h**

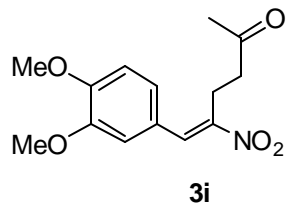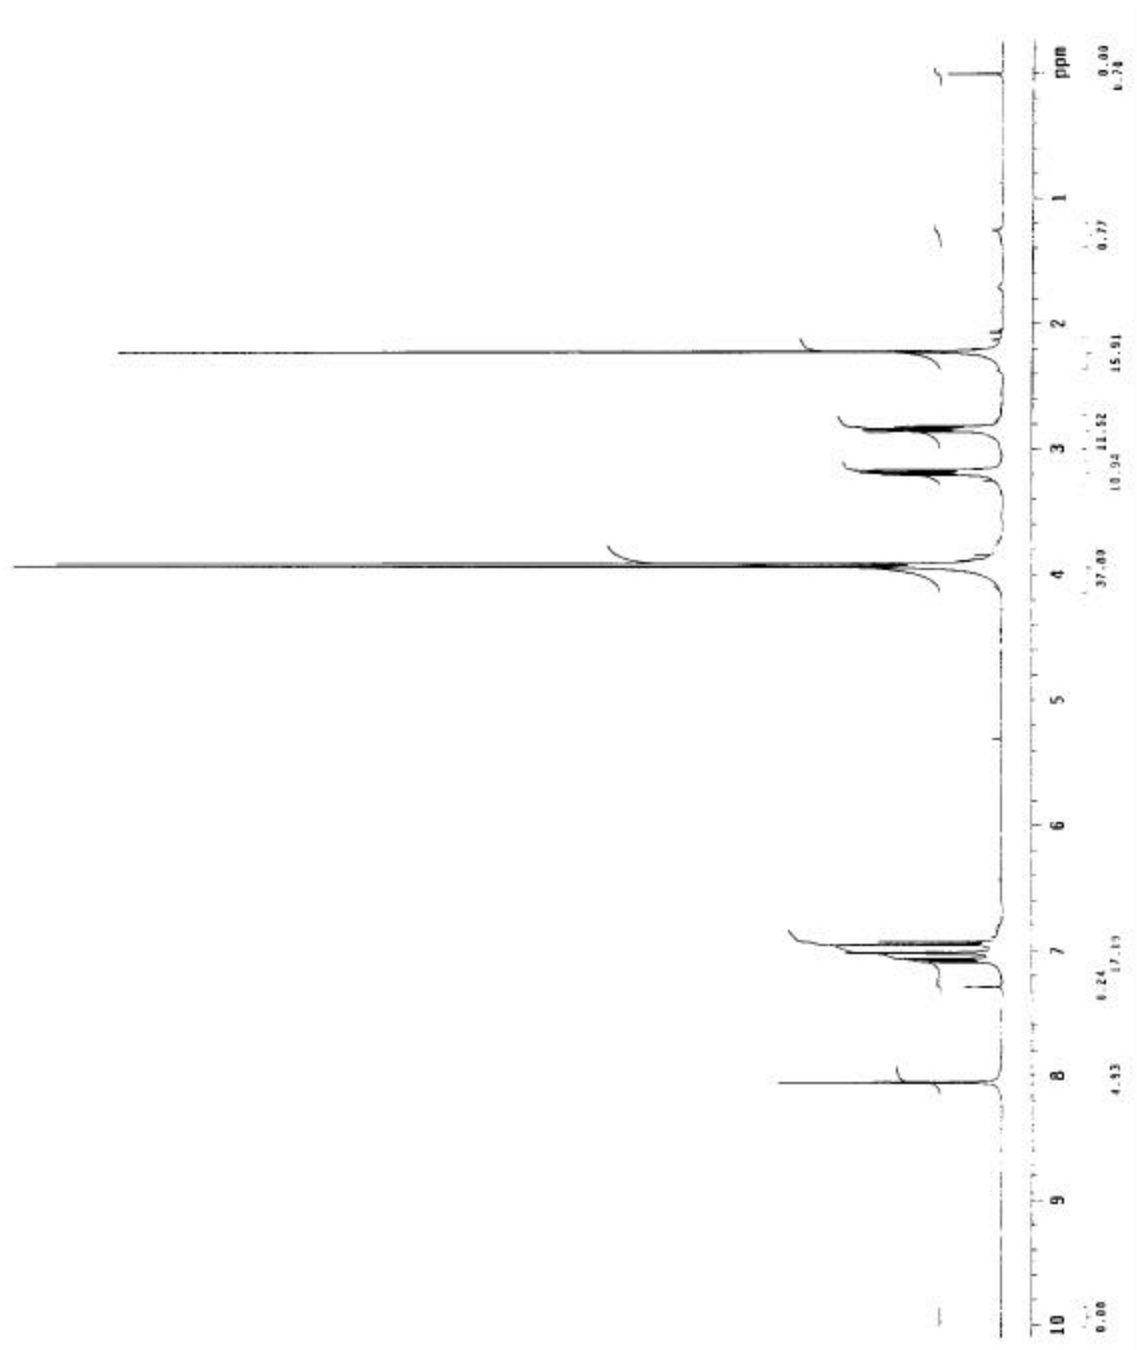

**Figure S18.**  $^1\text{H}$  NMR Spectrum of **3i**

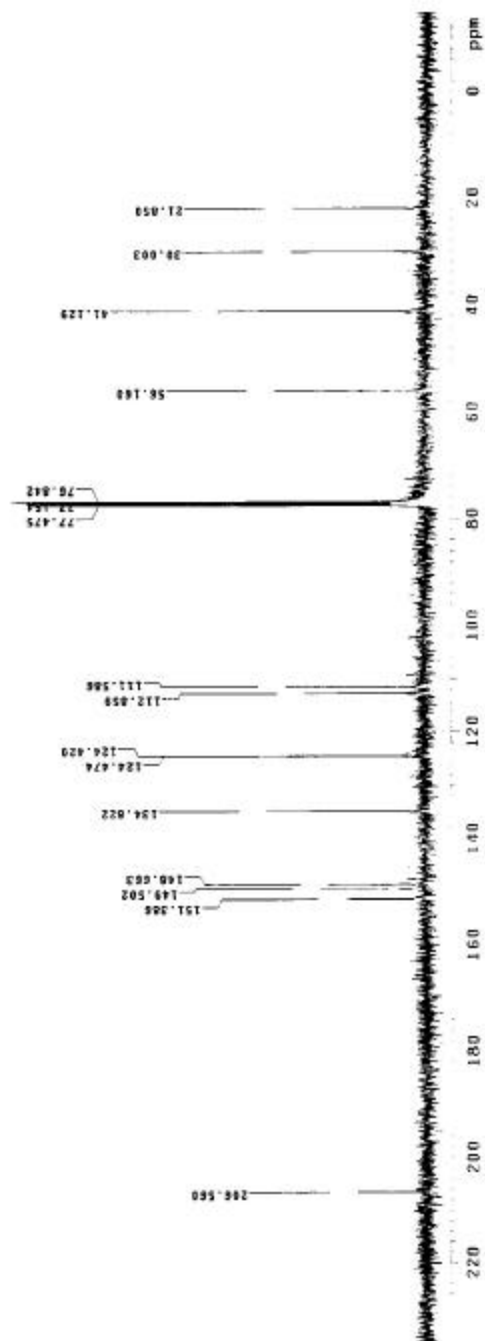

**Figure S19.** <sup>13</sup>C NMR Spectrum of **3i**

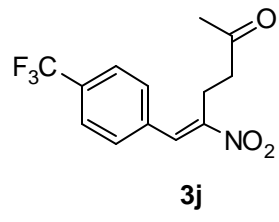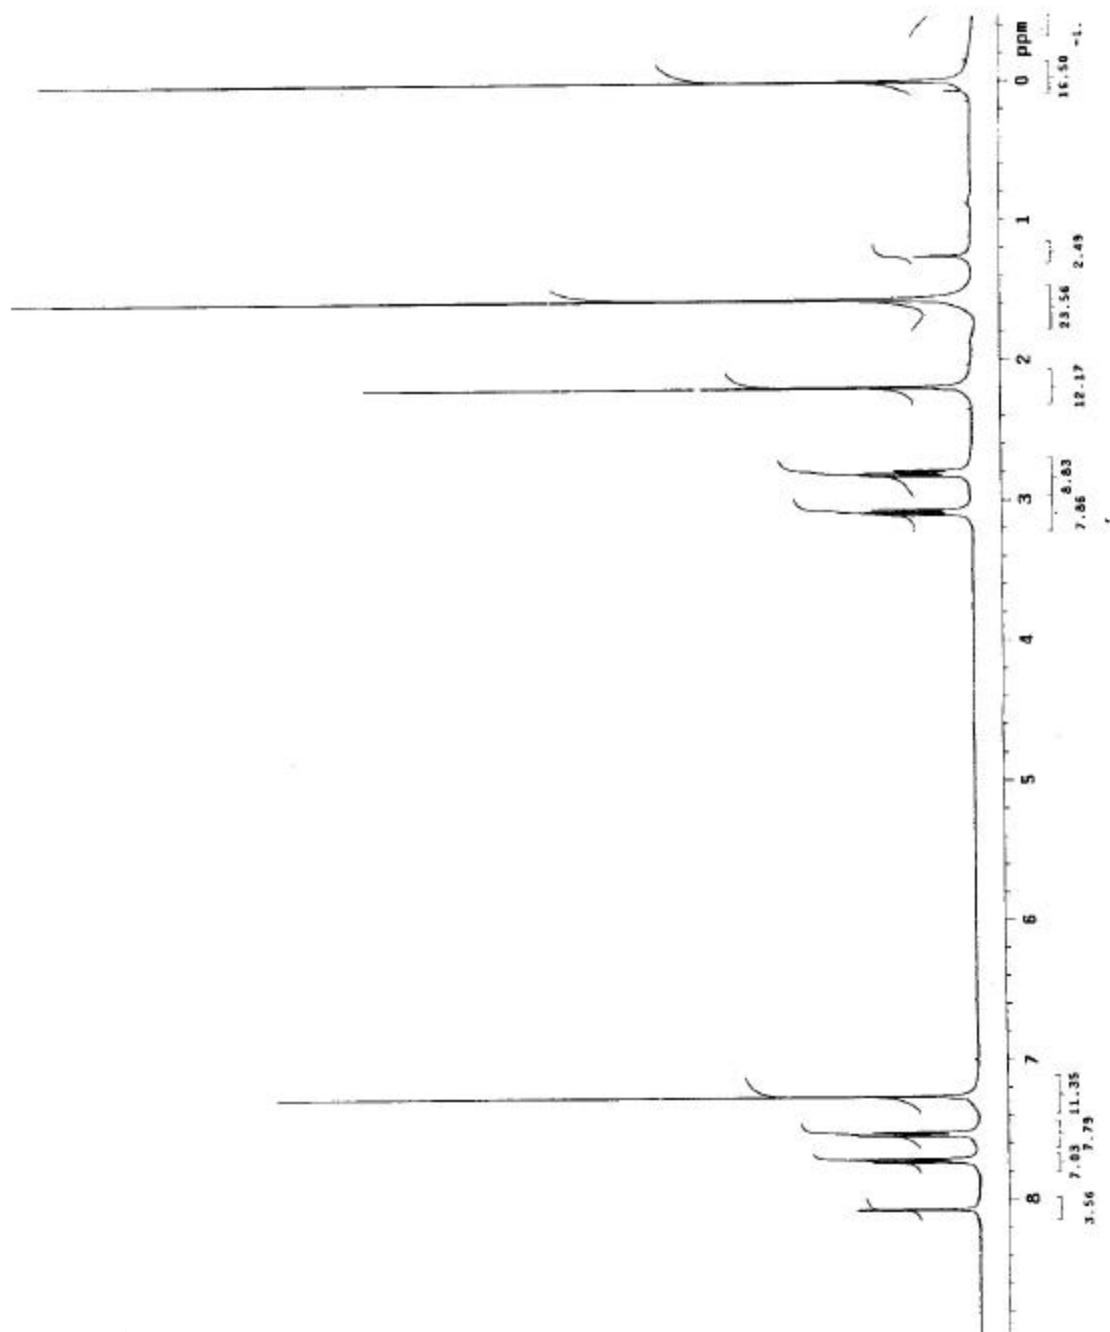

Figure S20. <sup>1</sup>H NMR Spectrum of 3j

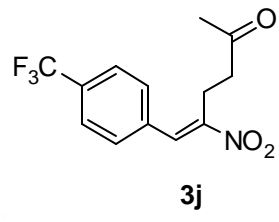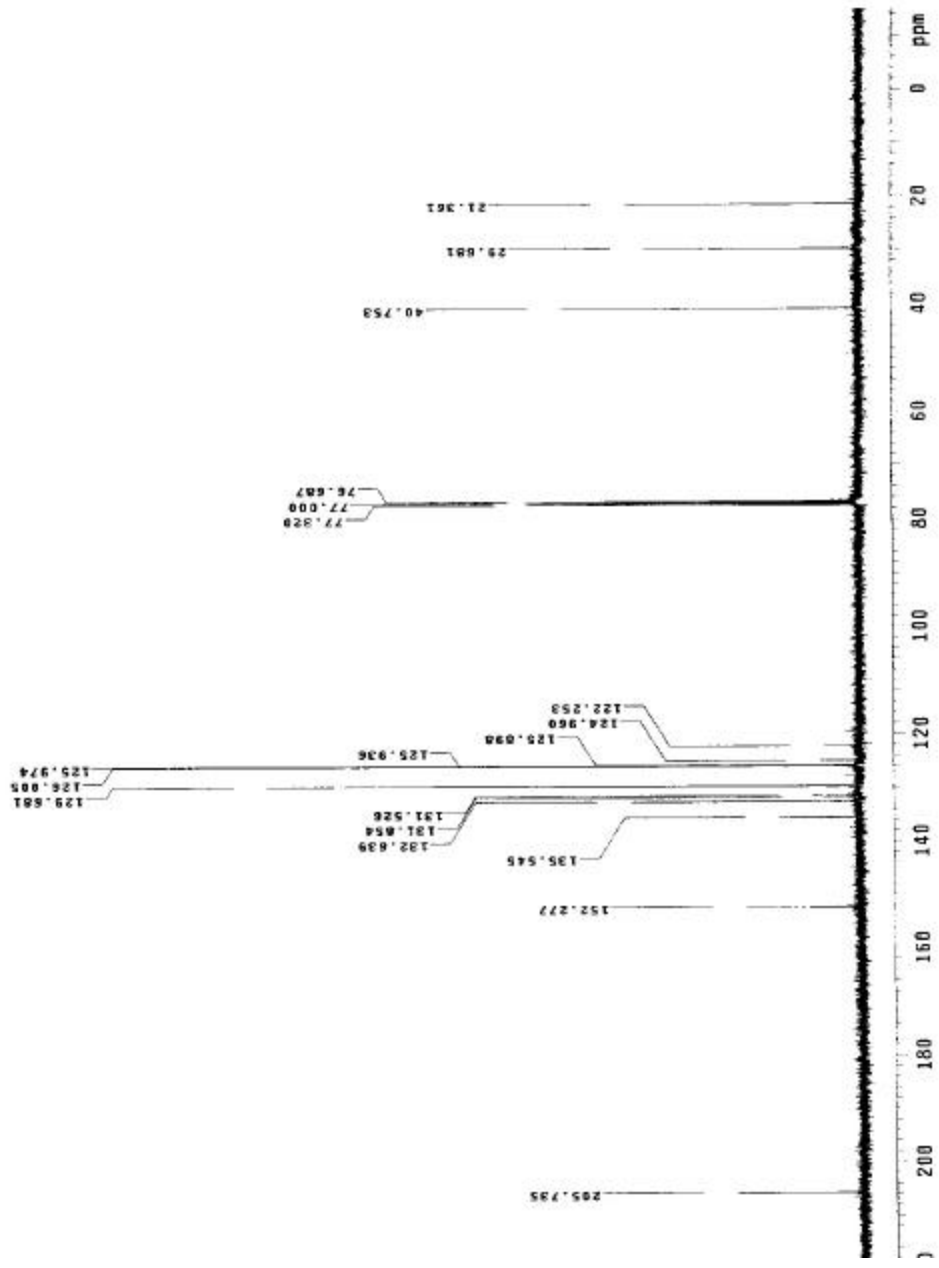

Figure S21. <sup>13</sup>C NMR Spectrum of **3j**

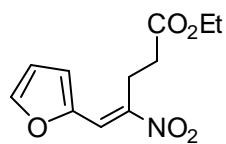

5a

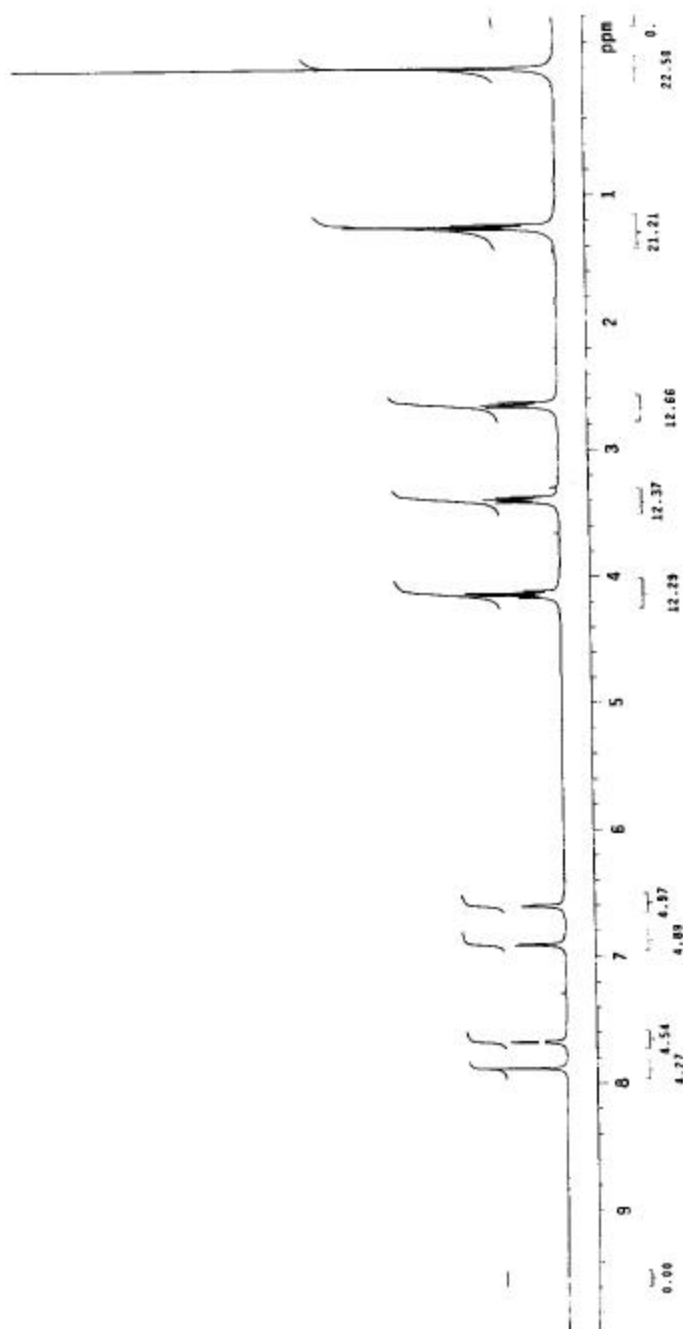

Figure S22. <sup>1</sup>H NMR Spectrum of 5a

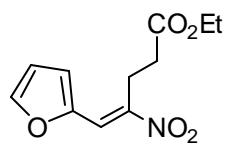

5a

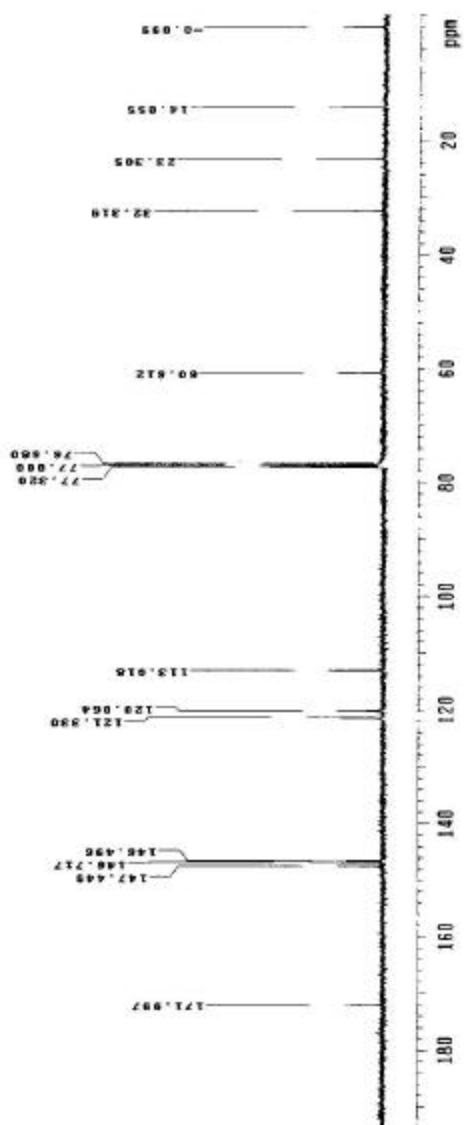

Figure S23. <sup>13</sup>C NMR Spectrum of 5a



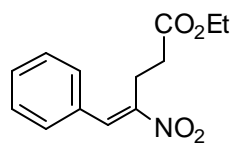

5g

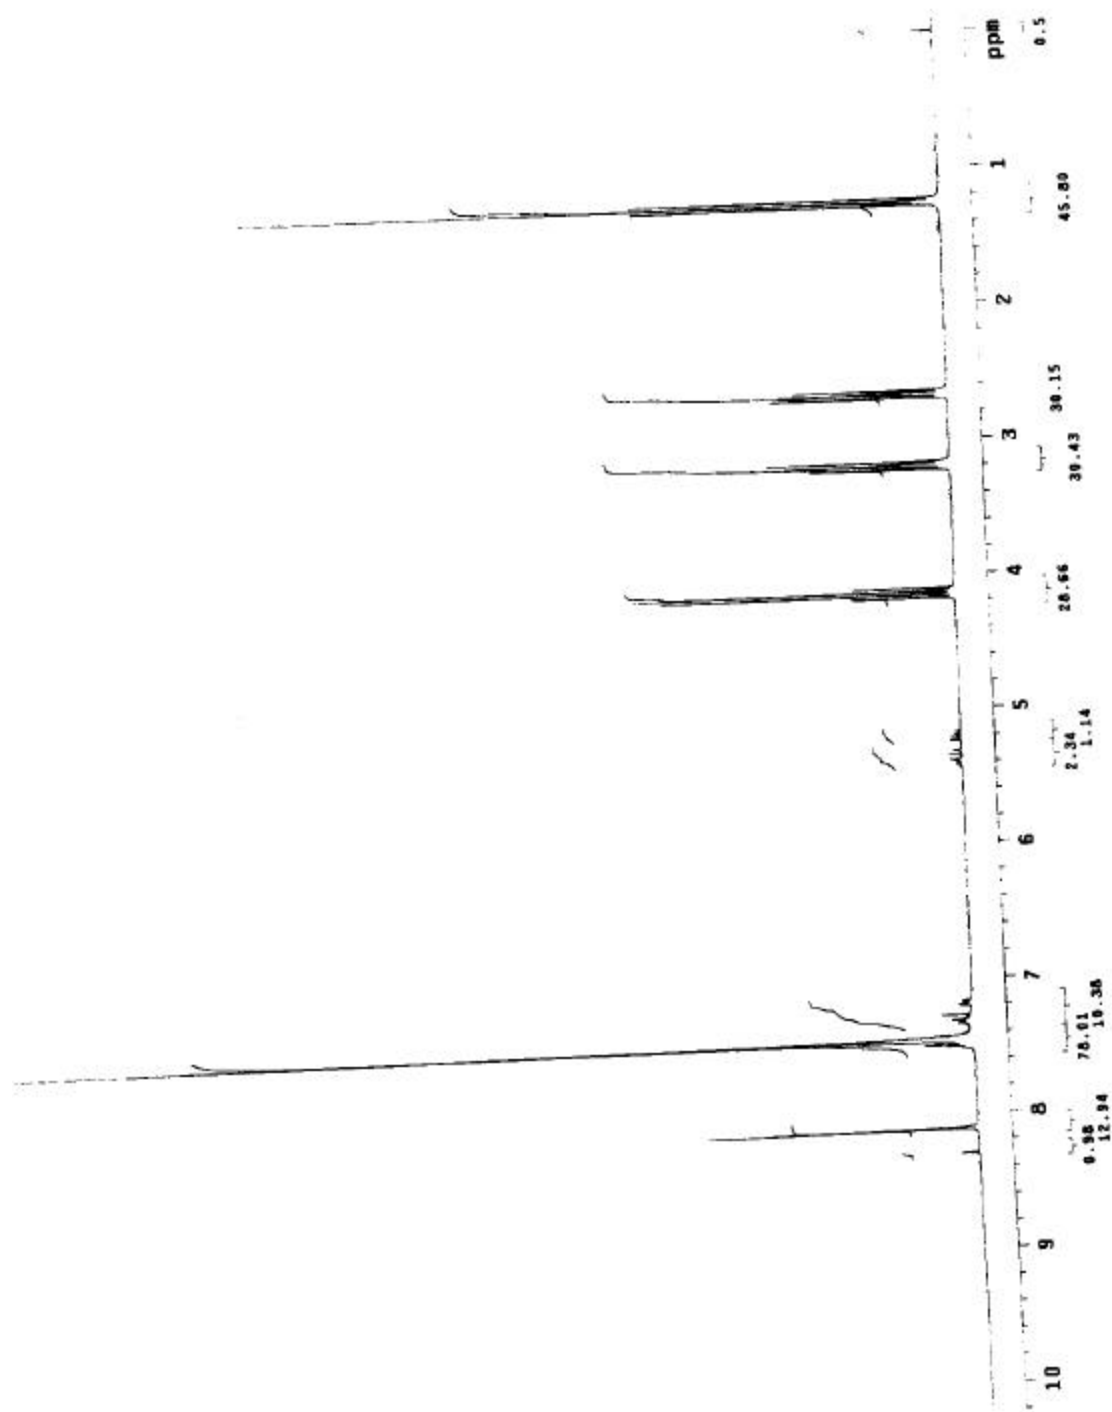

Figure S24. <sup>1</sup>H NMR Spectrum of 5g

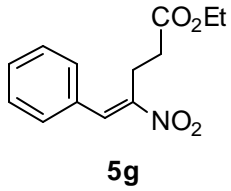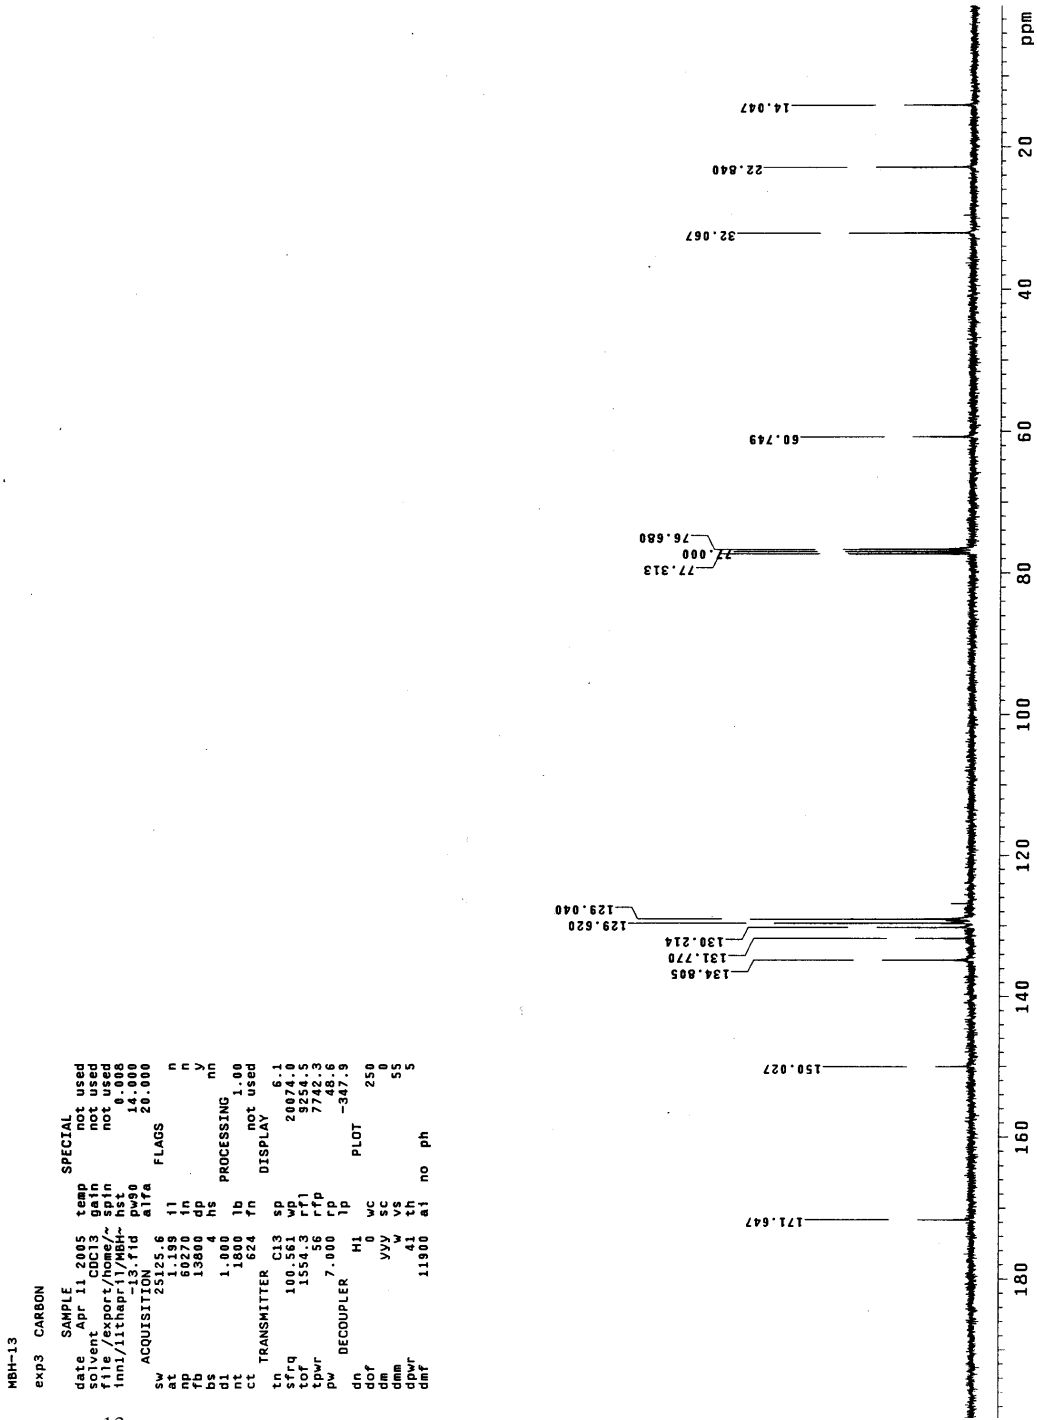

**Figure S25.**  $^{13}\text{C}$  NMR Spectrum of **5g**

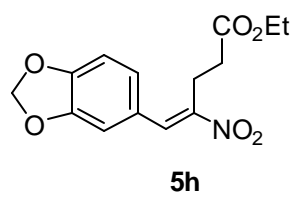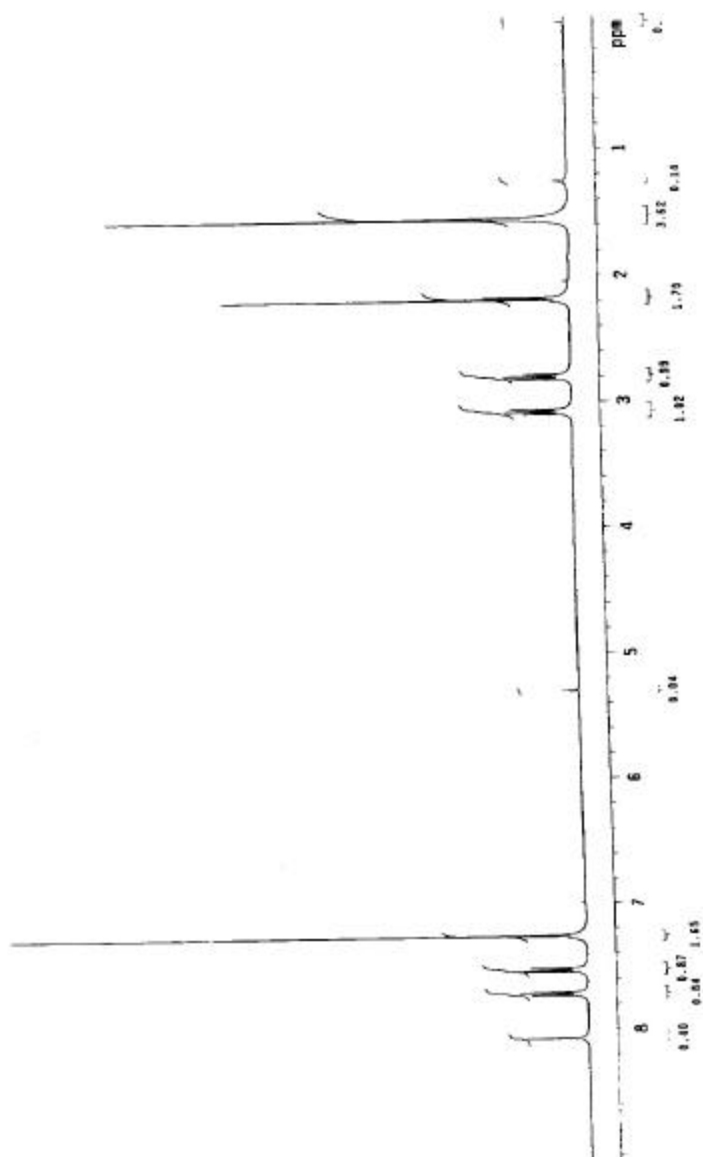

**Figure S26.** <sup>1</sup>H NMR Spectrum of **5h**

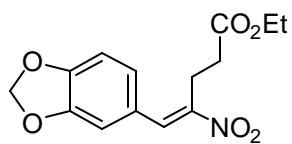

**5h**

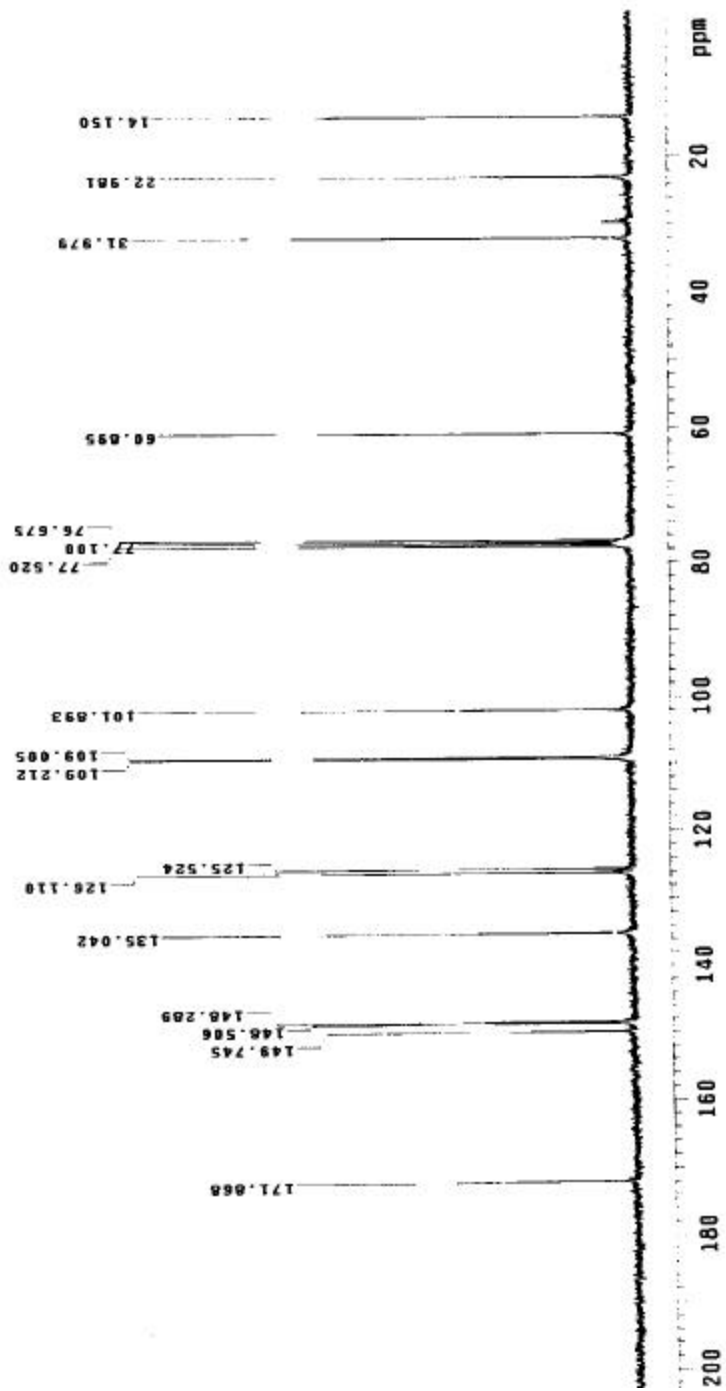

**Figure S27.** <sup>13</sup>C NMR Spectrum of **5h**

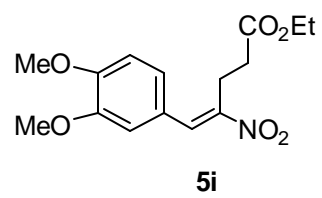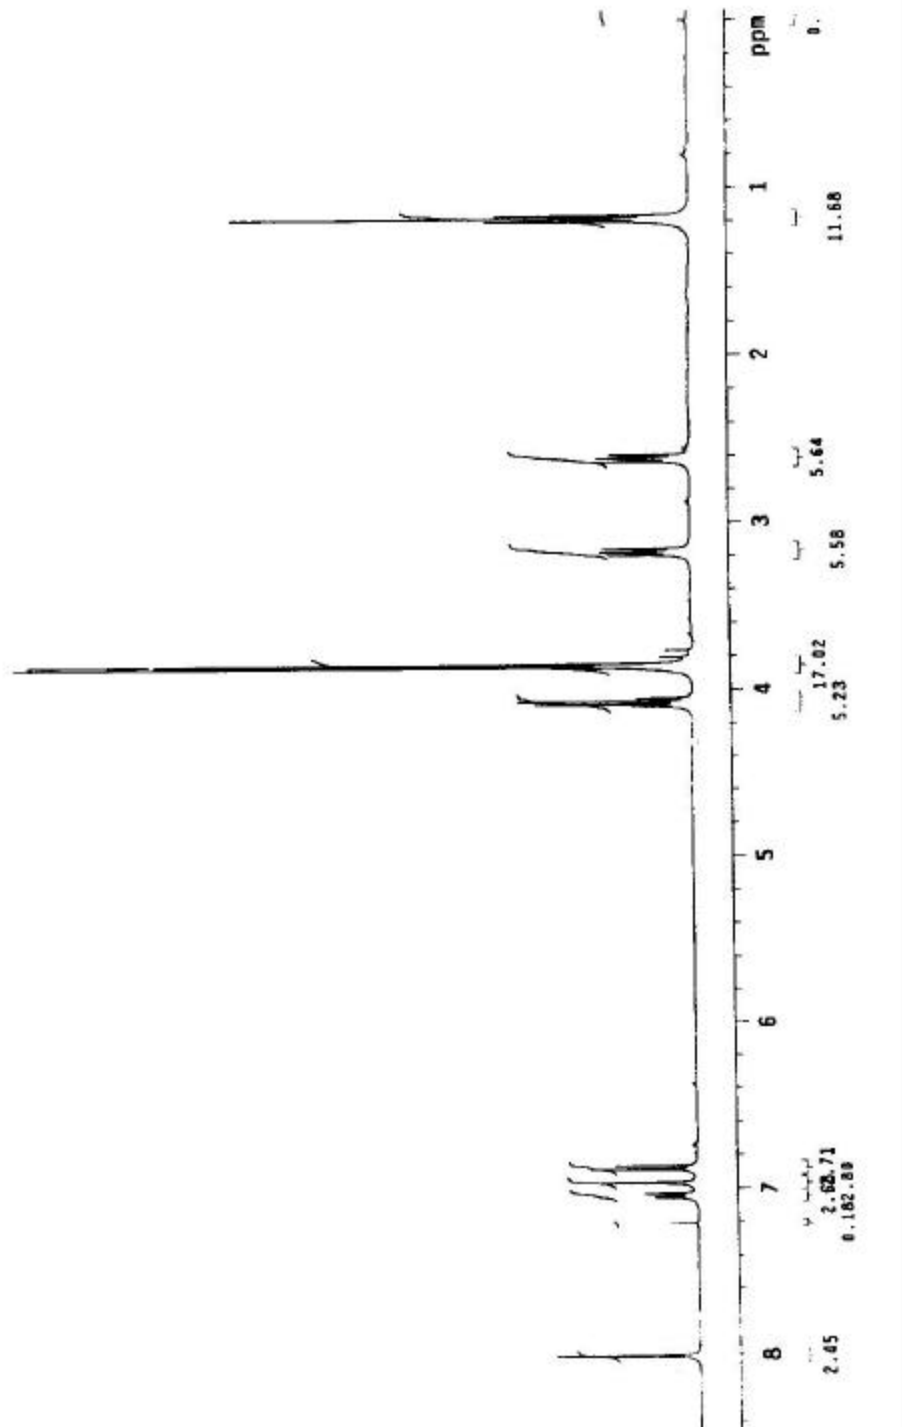

**Figure S28.** <sup>1</sup>H NMR Spectrum of **5i**

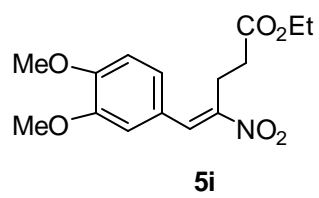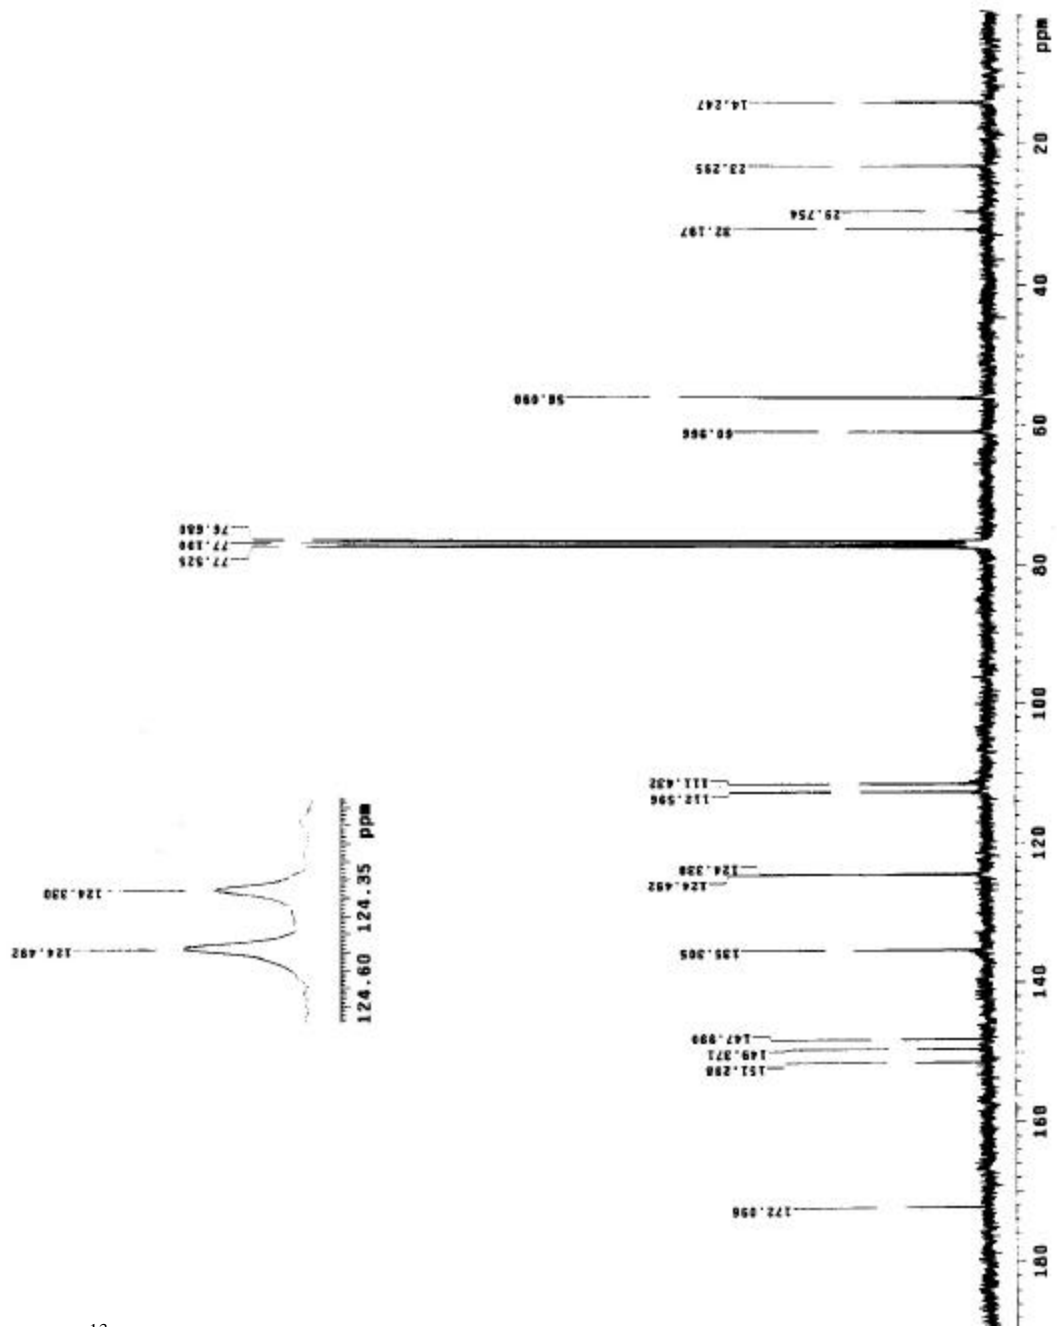

**Figure S29.** <sup>13</sup>C NMR Spectrum of **5i**
